# Supplementary material for: Changes in family medicine visits across sociodemographic groups after the onset of the COVID-19 pandemic in Ontario: a retrospective cohort study
Source: PubMed Central journal article supplement — CMAJ Open. 2021 Jun 15;9(2):E651–8. doi: 10.9778/cmajo.20210005 (PMC8248562; doi:10.9778/cmajo.20210005), 2021-06-15
Supplement: 2020-0005-original-submission.pdf [file 2020-0005-original-submission.pdf]

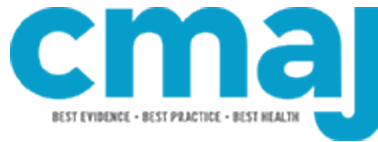

**Changes in family medicine visits after the onset of the COVID-19 pandemic in Ontario: a retrospective cohort study**

|                               |                                                                                                                                                                                                                                                                                                                                                                                                                                                                                                                                                                                                                                                                                                                                                                                                                                                                                                                                                                                                                        |
|-------------------------------|------------------------------------------------------------------------------------------------------------------------------------------------------------------------------------------------------------------------------------------------------------------------------------------------------------------------------------------------------------------------------------------------------------------------------------------------------------------------------------------------------------------------------------------------------------------------------------------------------------------------------------------------------------------------------------------------------------------------------------------------------------------------------------------------------------------------------------------------------------------------------------------------------------------------------------------------------------------------------------------------------------------------|
| Journal:                      | <i>CMAJ</i>                                                                                                                                                                                                                                                                                                                                                                                                                                                                                                                                                                                                                                                                                                                                                                                                                                                                                                                                                                                                            |
| Manuscript ID                 | CMAJ-21-0008                                                                                                                                                                                                                                                                                                                                                                                                                                                                                                                                                                                                                                                                                                                                                                                                                                                                                                                                                                                                           |
| Manuscript Type:              | Research - Cohort study (retrospective)                                                                                                                                                                                                                                                                                                                                                                                                                                                                                                                                                                                                                                                                                                                                                                                                                                                                                                                                                                                |
| Date Submitted by the Author: | 03-Jan-2021                                                                                                                                                                                                                                                                                                                                                                                                                                                                                                                                                                                                                                                                                                                                                                                                                                                                                                                                                                                                            |
| Complete List of Authors:     | Stephenson, Ellen; University of Toronto, Department of Family and Community Medicine<br>O'Neill, Braden; University of Toronto, Department of Family and Community Medicine; North York General Hospital<br>Gronsbell, Jessica; University of Toronto, Department of Statistical Sciences<br>Butt, Debra; University of Toronto, Department of Family and Community Medicine; Scarborough Health Network<br>Crampton, Noah; University of Toronto, Department of Family and Community Medicine; University Health Network, Toronto Western Family Health Team<br>Ji, Catherine; University of Toronto, Department of Family and Community Medicine; University Health Network, Toronto Western Family Health Team<br>Kalia, Sumeet; University of Toronto Faculty of Medicine, Family and community medicine<br>Meaney, Christopher; University of Toronto, Department of Family and Community Medicine<br>Tu, Karen; University of Toronto, Department of Family and Community Medicine; North York General Hospital |
| Keywords:                     | Family Medicine, General Practice, Primary Care                                                                                                                                                                                                                                                                                                                                                                                                                                                                                                                                                                                                                                                                                                                                                                                                                                                                                                                                                                        |
| More Detailed Keywords:       | Health services, electronic medical records, COVID-19, socioeconomic disparities                                                                                                                                                                                                                                                                                                                                                                                                                                                                                                                                                                                                                                                                                                                                                                                                                                                                                                                                       |
| Abstract:                     | <p>Background: The COVID-19 pandemic has markedly changed the practice of family medicine. There are concerns that the pandemic may have worsened socioeconomic disparities in access to family physicians. The aim of the current study was to demonstrate the impact of COVID-19 on family physician visits and to determine how these changes related to patient demographic characteristics.</p> <p>Methods: Billing data for January 1, 2019-June 30, 2020 was extracted from electronic medical records of 365 family physicians (N = 372,272 patients) who are part of the University of Toronto Practice-Based Research Network (UTOPIAN) and used to study changes in family physician visits with the onset of the COVID-19 pandemic in Ontario.</p> <p>Results: During the pandemic (March 14-June 30, 2020), the number of individual patients seen was 35% lower (95,643 compared to 146,039 in 2019) and the number of distinct visits was 22% lower (187,392</p>                                        |

1  
2  
3  
4  
5  
6  
7  
8  
9  
10  
11  
12  
13  
14  
15  
16  
17  
18  
19  
20  
21  
22  
23  
24  
25  
26  
27  
28  
29  
30  
31  
32  
33  
34  
35  
36  
37  
38  
39  
40  
41  
42  
43  
44  
45  
46  
47  
48  
49  
50  
51  
52  
53  
54  
55  
56  
57  
58  
59  
60

|  |                                                                                                                                                                                                                                                                                                                                                                                                                                                                                                                                                                                                                                                                                                                                                                                      |
|--|--------------------------------------------------------------------------------------------------------------------------------------------------------------------------------------------------------------------------------------------------------------------------------------------------------------------------------------------------------------------------------------------------------------------------------------------------------------------------------------------------------------------------------------------------------------------------------------------------------------------------------------------------------------------------------------------------------------------------------------------------------------------------------------|
|  | <p>compared to 239,605 in 2019), with 85% of visits (159,414/187,392) occurring via telephone or video. Changes in the number of patients seen during the pandemic were unrelated to neighbourhood income, material deprivation, and ethnic conception (ps &lt;.05). Patients from the lowest income and lowest socioeconomic status communities accessed slightly more care than other patients during the pandemic, accounting for larger proportions (ps &lt;.05) of the total number of visits compared to the same time the year before.</p> <p>Interpretation: Although family physician visits were substantially reduced during the first few weeks of the COVID-19 pandemic, this did not disproportionately affect low income or low socioeconomic status communities.</p> |
|  |                                                                                                                                                                                                                                                                                                                                                                                                                                                                                                                                                                                                                                                                                                                                                                                      |

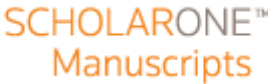

1  
2  
3  
4 **Title:** Changes in family medicine visits after the onset of the COVID-19 pandemic in Ontario: a  
5  
6 retrospective cohort study  
7  
8  
9

10  
11  
12 **Authors:**

13  
14 Ellen Stephenson, PhD <sup>1</sup>

15  
16 Braden O'Neill, MD, DPhil <sup>1,2</sup>

17  
18 Jessica Gronsbell, PhD <sup>3</sup>

19  
20 Debra Butt, MD, MSc <sup>1,4</sup>

21  
22 Noah Crampton, MD, MSc <sup>1,5</sup>

23  
24 Catherine Ji, MD, MSc <sup>1,5</sup>

25  
26 Sumeet Kalia, MSc <sup>1</sup>

27  
28 Chris Meaney, MSc <sup>1</sup>

29  
30 Karen Tu, MD, MSc <sup>1,2,5</sup>

31  
32  
33 **Affiliations:**

- 34  
35  
36  
37  
38 1. Department of Family and Community Medicine, University of  
39 Toronto, Toronto, Ontario, Canada  
40  
41  
42 2. North York General Hospital, Toronto, Ontario, Canada  
43  
44  
45 3. Department of Statistical Sciences, University of Toronto, Ontario, Canada  
46  
47  
48 4. Scarborough Health Network, Toronto, Ontario, Canada  
49  
50  
51 5. Toronto Western Hospital Family Health Team, University Health Network  
52  
53

54  
55 **Correspondence** to Ellen Stephenson: [ellen.stephenson@utoronto.ca](mailto:ellen.stephenson@utoronto.ca)  
56  
57  
58  
59  
60

1  
2  
3 **Funding statement:** This study was made possible by a CIHR Operating Grant: COVID-19  
4 Mental Health & Substance Use – Matching Access to Service with Needs: grant #450302.  
5  
6  
7  
8  
9

10 **Declaration of authors competing interests:**

11  
12 Braden O’Neill is an Associate Editor, CMAJ.  
13

14 **Acknowledgements:**

15  
16  
17 Braden O’Neill, Debra Butt, Noah Crampton, and Karen Tu all received Research Scholar  
18 Awards from the Department of Family and Community Medicine at the University of Toronto.  
19

20 **Contribution Statement:**

21  
22  
23 Ellen Stephenson, Braden O’Neill, Debra Butt, Noah Crampton, Catherine Ji, Sumeet Kalia,  
24 Christopher Meaney and Karen Tu contributed to the acquisition of funding. Ellen Stephenson,  
25  
26 Braden O’Neill, Jessica Gronsbell, Debra Butt, Noah Crampton, Catherine Ji, Sumeet Kalia,  
27  
28 Christopher Meaney and Karen Tu contributed to the conception and design of the work and  
29  
30 interpretation of data. Ellen Stephenson and Jessica Gronsbell performed the analysis of the data.  
31  
32 Ellen Stephenson and Braden O’Neill each drafted parts of the manuscript. All of the authors  
33  
34 revised the manuscript critically for important intellectual content, gave final approval of the  
35  
36 version to be published and agreed to be accountable for all aspects of the work.  
37  
38  
39  
40  
41

42 **Data sharing statement:**

43  
44 Analytic code used for this study is archived within the UTOPIAN Data Safe Haven and is  
45  
46 available upon request.  
47  
48  
49  
50

51 **Word count: 2456/2500**  
52  
53  
54  
55  
56  
57  
58  
59  
60

## Abstract

**Background:** The COVID-19 pandemic has markedly changed the practice of family medicine. There are concerns that the pandemic may have worsened socioeconomic disparities in access to family physicians. The aim of the current study was to demonstrate the impact of COVID-19 on family physician visits and to determine how these changes related to patient demographic characteristics.

**Methods:** Billing data for January 1, 2019-June 30, 2020 was extracted from electronic medical records of 365 family physicians (N = 372,272 patients) who are part of the University of Toronto Practice-Based Research Network (UTOPIAN) and used to study changes in family physician visits with the onset of the COVID-19 pandemic in Ontario.

**Results:** During the pandemic (March 14-June 30, 2020), the number of individual patients seen was 35% lower (95,643 compared to 146,039 in 2019) and the number of distinct visits was 22% lower (187,392 compared to 239,605 in 2019), with 85% of visits (159,414/187,392) occurring via telephone or video. Changes in the number of patients seen during the pandemic were unrelated to neighbourhood income, material deprivation, and ethnic conception ( $ps < .05$ ). Patients from the lowest income and lowest socioeconomic status communities accessed slightly more care than other patients during the pandemic, accounting for larger proportions ( $ps < .05$ ) of the total number of visits compared to the same time the year before.

**Interpretation:** Although family physician visits were substantially reduced during the first few weeks of the COVID-19 pandemic, this did not disproportionately affect low income or low socioeconomic status communities.

## Introduction

The COVID-19 pandemic has had profound impacts on health care and society around the world. A major concern has been that health inequities attributed to socioeconomic disparities may be exacerbated, both in terms of the risk of developing COVID-19 (1) as well as poor outcomes among those who become infected (2–4). Supporting health equity has been an important feature of health system and primary care responses to COVID-19 (5–8). While social distancing and closure of businesses are considered important public health interventions widely recommended across jurisdictions to limit the spread of COVID-19 (9), there are concerns that these public health recommendations may also lead to worsening social disparities (10) and differential access to health care services, which could lead to poorer health outcomes both during the pandemic and in the future. The existence of socioeconomic disparities in primary care is well established across jurisdictions (11,12), however the extent to which the COVID-19 pandemic is worsening these disparities is not yet understood.

In Ontario, Canada, substantial changes occurred to health system operation with the onset of the pandemic. Ontario has a government single-payer health system through the Ontario Health Information Plan (OHIP) covering primary and hospital care for the vast majority of Ontario residents (13). At the start of the COVID-19 pandemic in mid-March 2020, non-essential hospital services were ordered to be substantially reduced (14), and family physicians were advised to switch, as much as possible, to ‘virtual’ (phone or video) visits instead of meeting patients in-person (15). This was incentivized through the introduction of virtual visit billing codes that were equivalent to those previously used to bill for in-person visits (16). Prior to this, virtual visits in primary care were not widely utilized as insured services under OHIP (17). This was an unprecedented modification to the conduct of family medicine in Ontario and occurred

1  
2  
3 concurrently with public health interventions including a provincial state of emergency involving  
4 instructions to only leave home for essential purposes such as accessing health care (18). It is  
5 therefore unknown what effects these multiple interventions and recommendations may have on  
6 differential access to family physicians across socioeconomic groups. Understanding patterns of  
7 family physician visits in the context of these marked changes is essential to anticipate future  
8 needs and to plan health services going forward.

## 17 **Methods**

### 21 **Study design**

22  
23  
24 We used a retrospective cohort design in which primary care visits for a fixed cohort of  
25 patients were observed in an 18-month period that included the onset of the COVID-19  
26 pandemic (January 1, 2019 – June 30, 2020). A fixed cohort of patients was used to minimize the  
27 impact of potential changes access to care for new patients. The STROBE and RECORD  
28 guidelines for studies using observational data were applied (19).

### 37 **Data Source**

38  
39  
40 Data for this study were from the University of Toronto Practice-Based Research  
41 Network (UTOPIAN) Data Safe Haven, a primary care electronic medical record (EMR)  
42 database (20). This database includes records from 88 family medicine clinics in the Greater  
43 Toronto Area and beyond. To be eligible for inclusion in this study family physicians had to  
44 have: 1) billing, medication, and lab data recorded for at least 20% of their patients, 2) at least  
45 200 rostered patients, and 3) have started using their EMR on or before January 1, 2019. To be  
46 eligible for inclusion, patient records had to have: 1) patient sex and a valid month and year of

1  
2  
3 birth recorded, 2) their first entry within the EMR on or before January 1, 2019 (unless the  
4 patient was born after this date, in which case at least one visit documented in the EMR was  
5 sufficient for inclusion), and 3) been rostered to a participating physician or have had at least one  
6 period health exam or last 2 visits with a participating physician within the past 3 years (see  
7 Supplementary Appendix). This study was approved through the University of Toronto and  
8 North York General Hospital research ethics boards.  
9  
10  
11  
12  
13  
14  
15  
16  
17

### 18 **Outcome Measures**

19  
20  
21 Two outcome measures were used: 1) the number of different individual patients seen  
22 during a fixed period of time (patient volume), and 2) the number of distinct family physician  
23 visits that occurred during a fixed period of time (visit volume). The occurrence of a family  
24 physician visit was defined based on OHIP service billing codes recorded within the EMR. A  
25 detailed description of the codes used to indicate a family physician office visit is provided in the  
26 Appendix. A maximum of one in-person visit and one virtual visit via telephone or video was  
27 counted per patient per day.  
28  
29  
30  
31  
32  
33  
34  
35  
36  
37

### 38 **Sociodemographic Measures**

39  
40  
41 Measures of neighbourhood income, material deprivation, and ethnic concentration were  
42 derived based on the patient's postal code. These were mapped to previously defined quintiles for  
43 neighbourhood income (21) and the material deprivation and ethnic concentration dimensions of  
44 the Ontario Marginalization Index (22). Material deprivation refers to inability for individuals  
45 and communities to access and attain basic material needs and is a useful proxy for an  
46 individual's socioeconomic status (22, 23). Ethnic concentration refers to the area-level  
47  
48  
49  
50  
51  
52  
53  
54  
55  
56  
57  
58  
59  
60



1  
2  
3 concentration of people who are recent immigrants and/or members of a “visible minority” group  
4  
5  
6  
7 (defined by Statistics Canada as “persons, other than aboriginal peoples, who are non-Caucasian  
8  
9  
10 in race or non-white in colour”) (22). It provides measure of race/ethnicity that has been used to  
11  
12 study health equalities, including COVID-19 epidemiology (24).  
13  
14

### 15 **Analytic approach**

16  
17  
18  
19 Descriptive statistics were used to evaluate changes in patient volume and visit volume  
20  
21 over time. A series of comparisons were made between groups using chi-square tests to evaluate  
22  
23 differences in family medicine visits based on patient sex, age, and neighbourhood-level income,  
24  
25 material deprivation, and ethnic concentration. When a significant difference was observed, we  
26  
27 examined standardized residuals and used the Holm’s procedure to adjust for the effect of  
28  
29 multiple comparisons (25).  
30  
31  
32  
33  
34

35 Patients were first compared based on whether they visited their family physician at least  
36  
37 once during the study period (visitors) or had no visits recorded (non-visitors). Next, the patient  
38  
39 volume and visit volume was computed for each week in the observation period, and aggregated  
40  
41 for key time periods: January 1, 2020-March 13, 2020 (pre-pandemic period) and March 14 –  
42  
43 June 30, 2020 (pandemic period) and the corresponding periods covered by the same dates in  
44  
45 2019. We then computed estimates of year-over-year change in patient and visit volumes and  
46  
47 compared the magnitude of these changes across patient age, sex, and socioeconomic groups.  
48  
49 The proportion of patients in each age, sex, and socioeconomic groups during the pandemic  
50  
51 period in 2020 was compared to the corresponding proportion for the same time the year before.  
52  
53  
54  
55  
56  
57  
58  
59  
60

1  
2  
3 Comparing the pandemic period in 2020 to the same dates in 2019 was done to account for  
4  
5 potential seasonality effects in patient and visit volumes.  
6  
7

## 8 **Results**

9

10  
11  
12 A total of 365 family physicians and 372,272 patients met criteria for inclusion in the  
13  
14 research cohort. From January 1, 2019 to June 30, 2020, there were 1,115,691 distinct visits and  
15  
16 952 instances when a patient had both an in-person visit and a virtual visit within the same day.  
17  
18 Across the 18-month observation period, 276,144 (74.2%) patients had at least one family  
19  
20 physician visit and 96,128 (25.8%) patients did not have any visits with their UTOPIAN family  
21  
22 physician. Patients who did not see their family physician during the study period were younger,  
23  
24 physician. Patients who did not see their family physician during the study period were younger,  
25  
26 more likely to be male and more likely to be from neighbourhoods with the lowest income, most  
27  
28 material deprivation and most ethnic diversity (Table 1).  
29

30  
31 Weekly patient counts and visits volumes for the full observation period are summarized  
32  
33 in Figures 1 and 2. Data from the first half of the year in 2019 and 2020 were used to make year-  
34  
35 over-year comparisons in patient volume (Table 2) and visit volume (Table 3). From January to  
36  
37 mid-March 2020 (pre-pandemic period), patient volume and visit volume remained nearly  
38  
39 identical to the year before (235 or 0.22% fewer individual patients and 1228 or 0.80% fewer  
40  
41 visits). From mid-March to the end of June (pandemic period) patient volume and visit volume  
42  
43 was substantially lower in 2020 compared to the year before, with 50,396 (34.5%) fewer  
44  
45 individual patients visiting their family physician and 52,213 (21.8%) fewer patient visits.  
46  
47 During the 2020 pandemic period 85.1% of patient visits (N = 159,415) occurred virtually, via  
48  
49 telephone or video.  
50  
51

52  
53 The magnitude of pandemic-related changes in patient volume and visit volume was not  
54  
55 the same for all patient groups, as shown in Figures 1 and 2. The largest absolute changes in  
56  
57  
58  
59  
60

1  
2  
3 patient and visit volumes were observed for females, people over age 65, and patients from the  
4  
5 highest income, least materially deprived, and most ethnically diverse communities. However,  
6  
7 these are the groups with the greatest representation in the UTOPIAN cohort and the highest  
8  
9 service use in 2019. Based on relative measures of year-over-year change, male patients and  
10  
11 patients aged 18 and younger showed the largest decreases during the pandemic.  
12  
13

14  
15 As shown in Table 4, relative change in patient volume varied significantly based on  
16  
17 patient sex and age categories, but not with respect to neighbourhood income, material  
18  
19 deprivation, and ethnic concentration quintiles. Relative change in visit volume was  
20  
21 significantly associated with patient age and sex, as well as neighbourhood income, material  
22  
23 deprivation, and ethnic concentration. Patients who were female, from the middle age categories,  
24  
25 or from neighbourhoods with the lowest income, lowest or highest material deprivation, or  
26  
27 moderate ethnic concentration (4<sup>th</sup> quintile) accounted for a larger proportion of the total visit  
28  
29 volume during the 2020 pandemic period than they did the year before.  
30  
31  
32  
33

### 34 **Interpretation**

35  
36  
37 This study of data from 365 family physicians in Ontario, Canada demonstrated a  
38  
39 substantial drop in the number of individual patients seen and total volume of visits during the  
40  
41 first few months of the COVID-19 pandemic. More than a third fewer individual patients were  
42  
43 seen at UTOPIAN sites from mid-March through the end of June in 2020, compared to the same  
44  
45 time period in 2019. Although the corresponding drop in the total number of family physician  
46  
47 visits was not as large, it was still over 20% lower than in 2019. The format of care delivery also  
48  
49 changed, with a substantial reduction in the number of in-person visits and a corresponding  
50  
51 increase in virtual visits conducted via telephone or video. This is consistent with public health  
52  
53  
54  
55  
56  
57  
58  
59  
60

1  
2  
3  
4 recommendations and recent reports of changes in family physicians' services in other parts of  
5  
6  
7 Canada (26,27) and internationally (28,29).  
8

9  
10 Despite concerns of worsening socioeconomic disparities in health care, we did not find  
11 any evidence that access to family physician visits after the onset of the COVID-19 pandemic  
12 differed based on neighbourhood income, material deprivation, or ethnic concentration. The  
13 proportion of patients from each socioeconomic quintile seen in primary care did not change as a  
14 result of the COVID-19 pandemic onset. However, there were differences in total visit volume as  
15 a function of neighbourhood characteristics. The reasons for these differences warrant further  
16 investigation and may reflect differences in how and when multiple distinct visits occurred for  
17 the same patient (e.g., a telephone visit followed by a visit in-person). Nevertheless, the pattern  
18 of change in visit volumes is not consistent with worsening socioeconomic disparities. Patients  
19 from the most disadvantaged neighbourhoods (i.e., lowest income / highest material deprivation)  
20 did not experience disproportionate decreases in visit volume; in fact, this group accounted for a  
21 larger proportion of total visit volume in the 2020 than it did in 2019. It is possible that the  
22 increased availability of services provided via telephone may have reduced some barriers to  
23 accessing family physician services and increased the number of visits for some patients.  
24  
25  
26  
27  
28  
29  
30  
31  
32  
33  
34  
35  
36  
37  
38  
39  
40  
41

42 There are several important features of the current study to consider when contextualizing  
43 the findings within the broader literature on socioeconomic disparities and health care changes  
44 due to COVID-19. For patients in the current study, access to family physician services was  
45 provided at no cost to the patient through a government funded insurance plan. Access to health  
46 insurance was not affected by disparities in loss of employment that occurred during the  
47 pandemic (30), thus our findings may not generalize to contexts where access to health insurance  
48 is provided through employment-based insurance programs. The UTOPIAN research cohort was  
49  
50  
51  
52  
53  
54  
55  
56  
57  
58  
59  
60

1  
2  
3 limited to patients who had recently visited or were currently ‘rostered to’ a family physician  
4  
5 (‘rostering’ is a process in Ontario where a patient-physician relationship is formally established,  
6  
7 and physicians are compensated through a blended-capitation payment model). Past research has  
8  
9 found that patients without a regular family physician are more likely to be male, younger, or a  
10  
11 recent immigrant (31). Disparities in who becomes a ‘rostered’ patient were outside the scope of  
12  
13 the current study; the extent to which these disparities in access to a regular family physician  
14  
15 have worsened during the COVID-19 pandemic is an area for further research. It is also  
16  
17 important to consider the potential for disparities in the effectiveness of family physician care  
18  
19 during the pandemic. Although we found that patients from different socioeconomic groups were  
20  
21 equally likely to be seen by their family physician during the pandemic, this does not necessarily  
22  
23 mean that the care they received, largely via telephone, was equally effective or appropriate for  
24  
25 all patients. Further research is needed to evaluate which types of services can be delivered  
26  
27 effectively via telephone and video, and for which patients. Services such as childhood  
28  
29 immunizations cannot be delivered virtually and may have been delayed given the decreased  
30  
31 visit volumes observed for children.  
32  
33  
34  
35  
36  
37

38  
39 There are several limitations, including that our analysis was limited to events that  
40  
41 occurred in 2019 and the first half of 2020 for a convenience (non-probability) sample of family  
42  
43 physicians. The effects of the COVID-19 pandemic are ongoing and UTOPIAN practices are not  
44  
45 necessarily representative of the experience across Ontario. Furthermore, neighbourhood level  
46  
47 measures of income, socioeconomic status, and ethnic concentration were used; these measures  
48  
49 derived from postal codes provide a useful proxy for individual level measures (22,23).  
50  
51 However, it is possible that there are disparities in family physician visits within neighbourhoods  
52  
53 or communities that could not be observed in the current study. Reasons for visiting a family  
54  
55  
56  
57  
58  
59  
60

1  
2  
3 physician were not considered in the current analysis. These may vary based on underlying  
4 health risks (e.g., disease comorbidities) and patient demographics such as age and sex. Further  
5 investigation is needed to understand if health services provided during the pandemic are  
6 reaching those with the greatest needs.  
7  
8  
9  
10  
11

12  
13 Overall, our findings show that family physician visits changed substantially during the  
14 first few months of the COVID-19 pandemic in Ontario, Canada. There were fewer patients  
15 accessing services, fewer office visits, and more services being provided via telephone or video.  
16  
17 Fortunately, the swift response to the COVID-19 pandemic in primary care appears to have been  
18 successful in maintaining access to care across socioeconomic groups in our study setting.  
19  
20 Nevertheless, efforts to assess and minimize socioeconomic disparities in health care will need to  
21 continue as the effects of the COVID-19 pandemic continue to evolve.  
22  
23  
24  
25  
26  
27  
28  
29  
30  
31  
32  
33  
34  
35  
36  
37  
38  
39  
40  
41  
42  
43  
44  
45  
46  
47  
48  
49  
50  
51  
52  
53  
54  
55  
56  
57  
58  
59  
60

## References

1. Hatef E, Chang HY, Kitchen C, Weiner JP, Kharrazi H. Assessing the impact of neighborhood socioeconomic characteristics on COVID-19 prevalence across seven states in the United States. *Front Public Heal.* 2020;8(September):1–7.
2. Chaudhry R, Dranitsaris G, Mubashir T, Bartoszko J, Riazi S. A country level analysis measuring the impact of government actions, country preparedness and socioeconomic factors on COVID-19 mortality and related health outcomes. *EClinicalMedicine.* 2020;25:100464.
3. Azar KMJ, Shen Z, Romanelli RJ, Lockhart SH, Smits K, Robinson S, et al. Disparities in outcomes among COVID-19 patients in a large health care system in California. *Health Aff.* 2020;39(7):1253–62.
4. Raine S, Liu A, Mintz J, Wahood W, Huntley K, Haffizulla F. Racial and ethnic disparities in covid-19 outcomes: Social determination of health. *Int J Environ Res Public Health.* 2020;17(21):1–16.
5. Berkowitz SA, Cené CW, Chatterjee A. Covid-19 and Health Equity — Time to Think Big. *N Engl J Med.* 2020 Sep 17;383(12):e76.
6. O’Neill B, Ferrer R, O’Brien P, Watt G, Gottlieb L, Pinto A, et al. Improving equity through primary care: Proceedings of the 2019 Toronto International Conference on quality in primary care. *Ann Fam Med.* 2020;18(4):364–9.
7. Wolfson JA, Leung CW. An opportunity to emphasize equity, social determinants, and prevention in primary care. *Ann Fam Med.* 2020;18(4):290–1.
8. Williams DR, Cooper LA. COVID-19 and health equity - a new kind of “herd

- immunity.” JAMA. 2020;323(24):2478–80.
9. Lewnard JA, Lo NC. Scientific and ethical basis for social-distancing interventions against COVID-19. *Lancet Infect Dis*. 2020 Jun;20(6):631–3.
  10. Silva DS, Smith MJ. Social distancing, social justice, and risk during the COVID-19 pandemic. *Can J Public Heal*. 2020;111(4):459–61.
  11. Olah ME, Gaisano G, Hwang SW. The effect of socioeconomic status on access to primary care: an audit study. *Can Med Assoc J*. 2013 Apr 2;185(6):E263–9.
  12. Griffith K, Evans L, Bor J. The affordable care act reduced socioeconomic disparities in health care access. *Health Aff*. 2017;36(8):1503–10.
  13. Service Ontario. What OHIP covers [Internet]. Queen’s Printer for Ontario, 2012–20. 2020 [cited 2020 Dec 11]. Available from: <https://www.ontario.ca/page/what-ohip-covers>
  14. Agnus H, Willams D, Anderson M. Ramping down elective surgeries and other non-emergent activities. Office of the Deputy Minister, Ontario Ministry of Health; 2020. Available from: [https://www.oha.com/Bulletins/DM%20OH%20CMOH%20memo%20COVID19%20elective%20surgery%20\(2020-03-15\).pdf](https://www.oha.com/Bulletins/DM%20OH%20CMOH%20memo%20COVID19%20elective%20surgery%20(2020-03-15).pdf)
  15. Primary care changes in response to Corona Virus (COVID- 19) effective March 14, 2020. Negotiations Branch, Ontario Ministry of Health; 2020. Available from: <http://www.health.gov.on.ca/en/pro/programs/ohip/bulletins/11000/bull11229.aspx>
  16. Changes to the Schedule of Benefits for Physician Services (Schedule) in response to COVID-19 influenza pandemic effective March 14, 2020. Health Services Branch, Ontario Ministry of Health; 2020. Available from:



- 1  
2  
3 <http://www.health.gov.on.ca/en/pro/programs/ohip/bulletins/4000/bul4745.aspx>  
4  
5  
6 17. Agarwal P, Kithulegoda N, Umpierre R, Pawlovich J, Nunes J, Pereira D'avila O, et  
7  
8 al. Telemedicine in the driver's seat: new role for primary care access in Brazil and  
9  
10 Canada. *Can Fam Physician*. 2020;66:104–11.  
11  
12 18. Ontario Enacts Declaration of Emergency to Protect the Public [Internet]. 2020.  
13  
14 Available from: [https://news.ontario.ca/en/release/56356/ontario-enacts-declaration-](https://news.ontario.ca/en/release/56356/ontario-enacts-declaration-of-emergency-to-protect-the-public)  
15  
16 [of-emergency-to-protect-the-public](https://news.ontario.ca/en/release/56356/ontario-enacts-declaration-of-emergency-to-protect-the-public)  
17  
18  
19 19. Benchimol EI, Smeeth L, Guttman A, Harron K, Moher D, Peteresen I, et al. The  
20  
21 REporting of studies Conducted using Observational Routinely-collected health Data  
22  
23 (RECORD) Statement. *PLoS Med*. 2015;12(10):1–22.  
24  
25  
26 20. Tu K, Sodhi S, Kidd M, et al. The University of Toronto Family Medicine Report:  
27  
28 Caring for our Diverse Populations. Toronto, ON; 2020.  
29  
30  
31 21. Postal Code OM Conversion File Plus (PCCF +) Version 7C, Reference Guide.  
32  
33 Statistics Canada; 2019.  
34  
35 22. Matheson F, Moloney G, van Ingen T. 2016 Ontario Marginalization Index User  
36  
37 Guide. Toronto, ON.; 2018. (Joint publication with Public Health Ontario).  
38  
39  
40 23. Matheson FI, Dunn JR, Smith KLW, Moineddin R, Glazier RH. Development of the  
41  
42 Canadian Marginalization Index: a new tool for the study of inequality. *Can J Public*  
43  
44 *Heal*. 2012;103(Supplement 2):S12-S16A.  
45  
46  
47 24. Ontario Agency for Health Protection and Promotion (Public Health Ontario).  
48  
49 COVID-19 in Ontario - A Focus on Diversity: January 15, 2020 to May 14, 2020  
50  
51 Toronto, ON: Queen's Printer for Ontario; 2020.  
52  
53  
54 25. Aickin M, Gensler H. Adjusting for multiple testing when reporting research results:  
55  
56  
57  
58  
59  
60

- 1  
2  
3 The Bonferroni vs Holm methods. *Am J Public Health*. 1996;86(5):726–8.  
4  
5  
6 26. Canadian Institute for Health Information. How COVID-19 affected physician  
7 services [Internet]. 2020 [cited 2020 Nov 19]. Available from:  
8 [https://www.cihi.ca/en/covid-19-resources/impact-of-covid-19-on-canadas-health-](https://www.cihi.ca/en/covid-19-resources/impact-of-covid-19-on-canadas-health-care-systems/how-covid-19-affected-physician-services)  
9 [care-systems/how-covid-19-affected-physician-services](https://www.cihi.ca/en/covid-19-resources/impact-of-covid-19-on-canadas-health-care-systems/how-covid-19-affected-physician-services)  
10  
11  
12  
13  
14  
15 27. Bhatia RS, Jamieson T, Shaw J, Piovesan C, Kelley LT, Falk W. Canada’s Virtual  
16 Care Revolution: A Framework for Success. 2020.  
17  
18  
19 28. Alexander GC, Tajanlangit M, Heyward J, Mansour O, Qato DM, Stafford RS. Use  
20 and content of primary care office-based vs telemedicine care visits during the  
21 COVID-19 pandemic in the US. *JAMA Netw open*. 2020;3(10):e2021476.  
22  
23  
24  
25  
26 29. Sigurdsson EL, Blondal AB, Jonsson JS, Tomasdottir MO, Hrafnkelsson H, Linnet K,  
27 et al. How primary healthcare in Iceland swiftly changed its strategy in response to the  
28 COVID-19 pandemic. *BMJ Open*. 2020;10(12):e043151.  
29  
30  
31  
32  
33 30. Agarwal SD, Sommers BD. Insurance coverage after job loss — the importance of the  
34 ACA during the COVID-associated recession. *N Engl J Med*. 2020 Oct  
35 22;383(17):1603–6.  
36  
37  
38  
39  
40 31. Hay C, Pacey M, Bains N, Ardal S. Understanding the unattached population in  
41 Ontario: evidence from the Primary Care Access Survey (PCAS). *Healthc Policy*.  
42 2010;6(2):33–47.  
43  
44  
45  
46  
47  
48  
49  
50  
51  
52  
53  
54  
55  
56  
57  
58  
59  
60

## Tables

**Table 1. Characteristics of patients with and without a family physician visit between January 1, 2019 and June 30, 2020**

|                         | All patients     |            | Patients with one or more visits during observation period (visitors) |            | Patients without any visits during observation period (non-visitors) |            | Significant difference between visitors and non-visitors |
|-------------------------|------------------|------------|-----------------------------------------------------------------------|------------|----------------------------------------------------------------------|------------|----------------------------------------------------------|
|                         | N                | % of total | N                                                                     | % of total | N                                                                    | % of total |                                                          |
| <b>Total</b>            | 372,272          |            | 276,144                                                               |            | 96,128                                                               |            |                                                          |
| <b>Mean age (SD)</b>    | 43.07<br>(23.18) |            | 44.95 (23.38)                                                         |            | 37.66 (21.71)                                                        |            | <i>p</i> <.001                                           |
| <b>Age groups</b>       |                  |            |                                                                       |            |                                                                      |            | <i>p</i> <.001                                           |
| 18 years and under      | 67,481           | 18.1       | 46,150                                                                | 16.7       | 21,331                                                               | 22.1       | NV                                                       |
| 19-34 years             | 71,168           | 19.1       | 46,386                                                                | 16.8       | 24,782                                                               | 25.8       | NV                                                       |
| 34-49 years             | 78,217           | 21.0       | 55,997                                                                | 20.3       | 22,220                                                               | 23.1       | NV                                                       |
| 50-64 years             | 80,885           | 21.7       | 64,434                                                                | 23.3       | 16,451                                                               | 17.1       | V                                                        |
| 65 years and over       | 74,521           | 20.0       | 63,177                                                                | 22.9       | 11,344                                                               | 11.8       | V                                                        |
| <b>Sex</b>              |                  |            |                                                                       |            |                                                                      |            | <i>p</i> <.001                                           |
| female                  | 205,877          | 55.3       | 160,171                                                               | 58.0       | 45,706                                                               | 47.6       | V                                                        |
| male                    | 166,395          | 44.7       | 115,973                                                               | 42.0       | 50,422                                                               | 52.5       | NV                                                       |
| <b>Income quintiles</b> |                  |            |                                                                       |            |                                                                      |            | <i>p</i> <.001                                           |

1  
2  
3  
4  
5  
6  
7  
8  
9  
10  
11  
12  
13  
14  
15  
16  
17  
18  
19  
20  
21  
22  
23  
24  
25  
26  
27  
28  
29  
30  
31  
32  
33  
34  
35  
36  
37  
38  
39  
40  
41  
42  
43  
44  
45  
46  
47

|                                       | All patients |            | Patients with one or more visits during observation period (visitors) |            | Patients without any visits during observation period (non-visitors) |            | Significant difference between visitors and non-visitors |
|---------------------------------------|--------------|------------|-----------------------------------------------------------------------|------------|----------------------------------------------------------------------|------------|----------------------------------------------------------|
|                                       | N            | % of total | N                                                                     | % of total | N                                                                    | % of total |                                                          |
| Q1 = poorest                          | 68,948       | 18.5       | 49,622                                                                | 18.0       | 19,326                                                               | 20.1       | NV                                                       |
| Q2                                    | 58,900       | 15.8       | 43,892                                                                | 15.9       | 15,008                                                               | 15.6       | V                                                        |
| Q3                                    | 61,686       | 16.6       | 46,214                                                                | 16.7       | 15,472                                                               | 16.1       | V                                                        |
| Q4                                    | 72,723       | 19.53      | 54,506                                                                | 19.7       | 18,217                                                               | 19.0       | V                                                        |
| Q5 = richest                          | 100,665      | 27.0       | 76,048                                                                | 27.5       | 24,617                                                               | 25.6       | V                                                        |
| Missing                               | 9,350        | 2.5        | 5,862                                                                 | 2.1        | 3,488                                                                | 3.6        |                                                          |
| <b>Material deprivation quintiles</b> |              |            |                                                                       |            |                                                                      |            | <i>p</i> < .001                                          |
| Q1 = least deprived                   | 95,042       | 25.5       | 72,057                                                                | 26.1       | 22,985                                                               | 23.9       | V                                                        |
| Q2                                    | 86,220       | 23.2       | 64,671                                                                | 23.4       | 21,549                                                               | 22.4       | V                                                        |
| Q3                                    | 68,833       | 18.5       | 51,536                                                                | 18.6       | 17,297                                                               | 18.0       | V                                                        |
| Q4                                    | 56,648       | 15.2       | 42,270                                                                | 15.3       | 14,378                                                               | 15.0       | V                                                        |
| Q5 = most deprived                    | 55,117       | 14.8       | 39,054                                                                | 14.2       | 16,063                                                               | 16.7       | NV                                                       |

|                                       | All patients |            | Patients with one or more visits during observation period (visitors) |            | Patients without any visits during observation period (non-visitors) |            | Significant difference between visitors and non-visitors |
|---------------------------------------|--------------|------------|-----------------------------------------------------------------------|------------|----------------------------------------------------------------------|------------|----------------------------------------------------------|
|                                       | N            | % of total | N                                                                     | % of total | N                                                                    | % of total |                                                          |
| Missing                               | 10,412       | 2.8        | 6,556                                                                 | 2.4        | 3,856                                                                | 4.0        | NV                                                       |
| <b>Ethnic concentration quintiles</b> |              |            |                                                                       |            |                                                                      |            | <i>p</i> < .001                                          |
| Q1 = least ethnic diversity           | 35,638       | 9.6        | 26,918                                                                | 9.8        | 8,720                                                                | 9.1        | V                                                        |
| Q2                                    | 48,074       | 12.9       | 35,979                                                                | 13.0       | 12,095                                                               | 12.6       | V                                                        |
| Q3                                    | 68,546       | 18.4       | 51,473                                                                | 18.6       | 17,073                                                               | 17.8       | V                                                        |
| Q4                                    | 96,757       | 26.0       | 72,948                                                                | 26.4       | 23,809                                                               | 24.8       | V                                                        |
| Q5 = most ethnic diversity            | 112,845      | 30.3       | 82,270                                                                | 29.8       | 30,575                                                               | 31.8       | NV                                                       |
| Missing                               | 10,412       | 2.8        | 6,556                                                                 | 2.4        | 3,856                                                                | 4.0        | NV                                                       |

NV = statistically significant comparison ( $p < .05$ ) with proportion among non-visitors greater than proportion among visitors. V = statistically significant comparison ( $p < .05$ ) with proportion among visitors greater than proportion among non-visitors.

1  
2  
3  
4  
5  
6  
7  
8  
9  
10  
11  
12  
13  
14  
15  
16  
17  
18  
19  
20  
21  
22  
23  
24  
25  
26  
27  
28  
29  
30  
31  
32  
33  
34  
35  
36  
37  
38  
39  
40  
41  
42  
43  
44  
45  
46  
47

**Table 2. Year-over-year change in patient volume from 2019 to 2020, before and after pandemic onset**

|                                            |                    | January 1 to March 13      |                            |                                |                          | March 14 to June 30        |                            |                                |                          |
|--------------------------------------------|--------------------|----------------------------|----------------------------|--------------------------------|--------------------------|----------------------------|----------------------------|--------------------------------|--------------------------|
|                                            |                    | Number of patients in 2019 | Number of patients in 2020 | Absolute change year over year | Percent change over year | Number of patients in 2019 | Number of patients in 2020 | Absolute change year over year | Percent change over year |
| <b>Total number of individual patients</b> |                    | 108,560                    | 108,325                    | -235                           | -0.22                    | 146,039                    | 95,643                     | -50,396                        | -34.5                    |
| <b>By patient sex</b>                      | Female             | 65,178                     | 64,774                     | -404                           | -0.62                    | 87,509                     | 58,757                     | -28,752                        | -32.9                    |
|                                            | Male               | 43,382                     | 43,551                     | 169                            | 0.39                     | 58,530                     | 36,886                     | -21,644                        | -37.0                    |
| <b>By patient age</b>                      | 18 years and under | 15,751                     | 16,077                     | 326                            | 2.1                      | 20,314                     | 11,383                     | -8,931                         | -44.0                    |
|                                            | 19-34 years        | 16,366                     | 16,133                     | -233                           | -1.4                     | 21,722                     | 15,264                     | -6,458                         | -29.7                    |
|                                            | 34-49 years        | 21,319                     | 21,150                     | -169                           | -0.79                    | 27,553                     | 18,655                     | -8,898                         | -32.3                    |
|                                            | 50-64 years        | 26,532                     | 26,561                     | 29                             | 0.11                     | 35,137                     | 23,331                     | -11,806                        | -33.6                    |
|                                            | 65 years and over  | 28,592                     | 28,404                     | -188                           | -0.66                    | 41,313                     | 27,010                     | -14,303                        | -34.6                    |
| <b>By income quintile</b>                  | Q1 = poorest       | 21,156                     | 21,041                     | -115                           | -0.54                    | 27,837                     | 18,608                     | -9,229                         | -33.2                    |
|                                            | Q2                 | 17,644                     | 17,630                     | -14                            | -0.08                    | 23,861                     | 15,774                     | -8,087                         | -33.9                    |
|                                            | Q3                 | 18,185                     | 18,123                     | -62                            | -0.34                    | 24,436                     | 16,023                     | -8,413                         | -34.4                    |
|                                            | Q4                 | 20,842                     | 21,024                     | 182                            | 0.87                     | 28,008                     | 18,075                     | -9,933                         | -35.4                    |
|                                            | Q5 = richest       | 28,488                     | 28,392                     | -96                            | -0.34                    | 38,930                     | 25,184                     | -13,746                        | -35.3                    |
|                                            | Missing            | 2,245                      | 2,115                      | -130                           | -5.8                     | 2,967                      | 1,979                      | -988                           | -33.3                    |

|                                         |                             | January 1 to March 13      |                            |                                |                               | March 14 to June 30        |                            |                                |                               |
|-----------------------------------------|-----------------------------|----------------------------|----------------------------|--------------------------------|-------------------------------|----------------------------|----------------------------|--------------------------------|-------------------------------|
|                                         |                             | Number of patients in 2019 | Number of patients in 2020 | Absolute change year over year | Percent change year over year | Number of patients in 2019 | Number of patients in 2020 | Absolute change year over year | Percent change year over year |
| <b>By material deprivation quintile</b> | Q1 = least deprived         | 27,685                     | 27,405                     | -280                           | -1.0                          | 37,564                     | 24,556                     | -13,008                        | -34.6                         |
|                                         | Q2                          | 24,544                     | 24,731                     | 187                            | 0.76                          | 33,332                     | 21,514                     | -11,818                        | -35.5                         |
|                                         | Q3                          | 20,088                     | 20,210                     | 122                            | 0.61                          | 27,120                     | 17,714                     | -9,406                         | -34.7                         |
|                                         | Q4                          | 17,075                     | 17,115                     | 40                             | 0.23                          | 22,922                     | 15,054                     | -7,868                         | -34.3                         |
|                                         | Q5 = most deprived          | 16,661                     | 16,489                     | -172                           | -1.0                          | 21,763                     | 14,594                     | -7,169                         | -32.9                         |
|                                         | Missing                     | 2,507                      | 2,375                      | -132                           | -5.3                          | 3,338                      | 2,211                      | -1,127                         | -33.8                         |
| <b>By ethnic concentration quintile</b> | Q1 = least ethnic diversity | 10,217                     | 10,238                     | 21                             | 0.21                          | 14,282                     | 9,579                      | -4,703                         | -32.9                         |
|                                         | Q2                          | 13,744                     | 13,845                     | 101                            | 0.73                          | 18,589                     | 12,287                     | -6,302                         | -33.9                         |
|                                         | Q3                          | 19,740                     | 19,782                     | 42                             | 0.21                          | 26,449                     | 17,497                     | -8,952                         | -33.9                         |
|                                         | Q4                          | 28,421                     | 28,583                     | 162                            | 0.57                          | 38,557                     | 25,123                     | -13,434                        | -34.8                         |
|                                         | Q5 = most ethnic diversity  | 33,931                     | 33,502                     | -429                           | -1.3                          | 44,824                     | 28,946                     | -15,878                        | -35.4                         |
|                                         | Missing                     | 2,507                      | 2,375                      | -132                           | -5.3                          | 3,338                      | 2,211                      | -1,127                         | -33.8                         |

1  
2  
3  
4  
5  
6  
7  
8  
9  
10  
11  
12  
13  
14  
15  
16  
17  
18  
19  
20  
21  
22  
23  
24  
25  
26  
27  
28  
29  
30  
31  
32  
33  
34  
35  
36  
37  
38  
39  
40  
41  
42  
43  
44  
45  
46  
47

**Table 3. Year-over-year change in visit volume from 2019 to 2020, before and after pandemic onset**

|                                                |                    | January 1 to March 13    |                          |                           |                          | March 14 to June 30      |                          |                           |                          |
|------------------------------------------------|--------------------|--------------------------|--------------------------|---------------------------|--------------------------|--------------------------|--------------------------|---------------------------|--------------------------|
|                                                |                    | Number of visits in 2019 | Number of visits in 2020 | Absolute change over year | Percent change over year | Number of visits in 2019 | Number of visits in 2020 | Absolute change over year | Percent change over year |
| <b>Total number of distinct patient visits</b> |                    | 153,896                  | 155,124                  | 1,228                     | 0.80                     | 239,605                  | 187,392                  | -52,213                   | -21.8                    |
| <b>By patient sex</b>                          | Female             | 93,797                   | 94,266                   | 469                       | 0.50                     | 147,185                  | 118,509                  | -28,676                   | -19.5                    |
|                                                | Male               | 60,099                   | 60,858                   | 759                       | 1.26                     | 92,420                   | 68,883                   | -23,537                   | -25.5                    |
| <b>By patient age</b>                          | 18 years and under | 21,329                   | 22,420                   | 1,091                     | 5.12                     | 30,962                   | 19,713                   | -11,249                   | -36.3                    |
|                                                | 19-34 years        | 23,307                   | 22,955                   | -352                      | -1.51                    | 35,204                   | 30,018                   | -5,186                    | -14.7                    |
|                                                | 34-49 years        | 30,555                   | 30,158                   | -397                      | -1.30                    | 44,448                   | 36,767                   | -7,681                    | -17.3                    |
|                                                | 50-64 years        | 37,364                   | 37,429                   | 65                        | 0.17                     | 56,840                   | 45,312                   | -11,528                   | -20.3                    |
|                                                | 65 years and over  | 41,341                   | 42,162                   | 821                       | 1.99                     | 72,151                   | 55,582                   | -16,569                   | -23.0                    |
| <b>By income quintile</b>                      | Q1 = poorest       | 31,569                   | 31,497                   | -72                       | -0.23                    | 49,299                   | 39,230                   | -10,069                   | -20.4                    |
|                                                | Q2                 | 25,307                   | 25,628                   | 321                       | 1.27                     | 40,164                   | 31,664                   | -8,500                    | -21.2                    |
|                                                | Q3                 | 25,623                   | 25,730                   | 107                       | 0.42                     | 39,713                   | 31,200                   | -8,513                    | -21.4                    |
|                                                | Q4                 | 29,087                   | 29,536                   | 449                       | 1.54                     | 44,849                   | 34,274                   | -10,575                   | -23.6                    |
|                                                | Q5 = richest       | 39,037                   | 39,515                   | 478                       | 1.22                     | 60,498                   | 47,142                   | -13,356                   | -22.1                    |
|                                                | Missing            | 3,273                    | 3,218                    | -55                       | -1.68                    | 5,082                    | 3,882                    | -1,200                    | -23.6                    |



|                                         |                             | January 1 to March 13    |                          |                                |                               | March 14 to June 30      |                          |                                |                               |
|-----------------------------------------|-----------------------------|--------------------------|--------------------------|--------------------------------|-------------------------------|--------------------------|--------------------------|--------------------------------|-------------------------------|
|                                         |                             | Number of visits in 2019 | Number of visits in 2020 | Absolute change year over year | Percent change year over year | Number of visits in 2019 | Number of visits in 2020 | Absolute change year over year | Percent change year over year |
| <b>By material deprivation quintile</b> | Q1 = least deprived         | 38,554                   | 38,773                   | 219                            | 0.57                          | 59,950                   | 47,903                   | -12,047                        | -20.1                         |
|                                         | Q2                          | 34,150                   | 34,793                   | 643                            | 1.88                          | 52,820                   | 40,873                   | -11,947                        | -22.6                         |
|                                         | Q3                          | 28,083                   | 28,595                   | 512                            | 1.82                          | 43,878                   | 33,628                   | -10,250                        | -23.4                         |
|                                         | Q4                          | 24,621                   | 24,616                   | -5                             | -0.02                         | 38,708                   | 29,849                   | -8,859                         | -22.9                         |
|                                         | Q5 = most deprived          | 24,751                   | 24,714                   | -37                            | -0.15                         | 38,439                   | 30,855                   | -7,584                         | -19.7                         |
|                                         | Missing                     | 3,737                    | 3,633                    | -104                           | -2.78                         | 5,810                    | 4,284                    | -1,526                         | -26.3                         |
| <b>By ethnic concentration quintile</b> | Q1 = least ethnic diversity | 14,197                   | 14,551                   | 354                            | 2.49                          | 23,117                   | 17,910                   | -5,207                         | -22.5                         |
|                                         | Q2                          | 19,306                   | 19,651                   | 345                            | 1.79                          | 29,937                   | 22,547                   | -7,390                         | -24.7                         |
|                                         | Q3                          | 27,459                   | 27,785                   | 326                            | 1.19                          | 42,070                   | 33,356                   | -8,714                         | -20.7                         |
|                                         | Q4                          | 39,860                   | 40,637                   | 777                            | 1.95                          | 62,115                   | 49,089                   | -13,026                        | -21.0                         |
|                                         | Q5 = most ethnic diversity  | 49,337                   | 48,855                   | -482                           | -0.98                         | 76,556                   | 59,284                   | -17,272                        | -22.6                         |
|                                         | Missing                     | 3,737                    | 3,633                    | -104                           | -2.78                         | 5,810                    | 4,269                    | -1,541                         | -26.5                         |

1  
2  
3  
4  
5  
6  
7  
8  
9  
10  
11  
12  
13  
14  
15  
16  
17  
18  
19  
20  
21  
22  
23  
24  
25  
26  
27  
28  
29  
30  
31  
32  
33  
34  
35  
36  
37  
38  
39  
40  
41  
42  
43  
44  
45  
46  
47

**Table 4. Proportion total patient volume and total visit volume by age, sex, and socioeconomic group from March 14 – June 30 in 2019 and 2020**

| Factor                      | Comparison          | Proportion of total patient volume |       |                 | Proportion of total visit volume |       |                 |
|-----------------------------|---------------------|------------------------------------|-------|-----------------|----------------------------------|-------|-----------------|
|                             |                     | 2019                               | 2020  | Difference test | 2019                             | 2020  | Difference test |
| <b>Sex</b>                  | Female (vs Male)    | 59.9%                              | 61.4% | $p < .001$      | 61.4%                            | 63.2% | $p < .001$      |
| <b>Age groups</b>           |                     |                                    |       | $p < .001$      |                                  |       | $p < .001$      |
|                             | Ages 0-18           | 13.9%                              | 11.9% | -               | 12.9%                            | 10.5% | -               |
|                             | Ages 19-34          | 14.9%                              | 16.0% | +               | 14.7%                            | 16.0% | +               |
|                             | Ages 35-49          | 18.9%                              | 19.5% | +               | 18.6%                            | 19.6% | +               |
|                             | Ages 50-64          | 24.1%                              | 24.4% |                 | 23.7%                            | 24.2% | +               |
|                             | Ages 65+            | 28.3%                              | 28.2% |                 | 30.1%                            | 29.7% | -               |
| <b>Income</b>               |                     |                                    |       | $p = .059$      |                                  |       | $p = .001$      |
|                             | Q1 = poorest        | 19.1%                              | 19.5% |                 | 20.6%                            | 20.9% | +               |
|                             | Q2                  | 16.3%                              | 16.5% |                 | 16.8%                            | 16.9% |                 |
|                             | Q3                  | 16.7%                              | 16.8% |                 | 16.6%                            | 16.7% |                 |
|                             | Q4                  | 19.2%                              | 18.9% |                 | 18.7%                            | 18.3% | -               |
|                             | Q5 = richest        | 26.7%                              | 26.3% |                 | 25.2%                            | 25.2% |                 |
|                             | Missing             | 2.0%                               | 2.1%  |                 | 2.1%                             | 2.1%  |                 |
| <b>Material deprivation</b> |                     |                                    |       | $p = .155$      |                                  |       | $p < .001$      |
|                             | Q1 = least deprived | 25.7%                              | 25.7% |                 | 25.0%                            | 25.5% | +               |
|                             | Q2                  | 22.8%                              | 22.5% |                 | 22.0%                            | 21.8% |                 |

| Factor                      | Comparison                  | Proportion of total patient volume |       |                 | Proportion of total visit volume |       |                 |
|-----------------------------|-----------------------------|------------------------------------|-------|-----------------|----------------------------------|-------|-----------------|
|                             |                             | 2019                               | 2020  | Difference test | 2019                             | 2020  | Difference test |
|                             | Q3                          | 18.6%                              | 18.5% |                 | 18.3%                            | 17.9% | -               |
|                             | Q4                          | 15.7%                              | 15.7% |                 | 16.2%                            | 15.9% |                 |
|                             | Q5 = most deprived          | 14.9%                              | 15.3% |                 | 16.0%                            | 16.5% | +               |
|                             | Missing                     | 2.3%                               | 2.3%  |                 | 2.4%                             | 2.3%  | -               |
| <b>Ethnic concentration</b> |                             |                                    |       | $p = .109$      |                                  |       | $p < .001$      |
|                             | Q1 = least ethnic diversity | 9.8%                               | 10.0% |                 | 9.64%                            | 9.56% |                 |
|                             | Q2                          | 12.7%                              | 12.8% |                 | 12.5%                            | 12.0% | -               |
|                             | Q3                          | 18.1%                              | 18.3% |                 | 17.6%                            | 17.8% |                 |
|                             | Q4                          | 26.4%                              | 26.3% |                 | 25.9%                            | 26.2% | +               |
|                             | Q5 = most ethnic diversity  | 30.7%                              | 30.3% |                 | 32.0%                            | 31.6% |                 |
|                             | Missing                     | 2.3%                               | 2.3%  |                 | 2.4%                             | 2.3%  | -               |

+ = statistically significant comparison ( $p < .05$ ), with proportion in 2020 greater than proportion in 2019; - = statistically significant comparison ( $p < .05$ ), with proportion in 2020 less than proportion in 2019.

## Figure Captions

1  
2  
3  
4  
5  
6  
7  
8  
9  
10  
11 **Figure 1.** Change in number of unique patients visiting their family physician each week (patient  
12 volume), by patient characteristics. The shaded grey area indicates the 2020 pandemic period  
13 (March 14 – June 30) and corresponding period in 2019.  
14  
15  
16  
17  
18  
19

20 **Figure 2.** Change in number of unique patient visits each week (visit volume), by patient  
21 characteristics. The shaded grey area indicates the 2020 pandemic period (March 14 – June 30)  
22 and corresponding period in 2019.  
23  
24  
25  
26  
27  
28  
29  
30  
31  
32  
33  
34  
35  
36  
37  
38  
39  
40  
41  
42  
43  
44  
45  
46  
47  
48  
49  
50  
51  
52  
53  
54  
55  
56  
57  
58  
59  
60

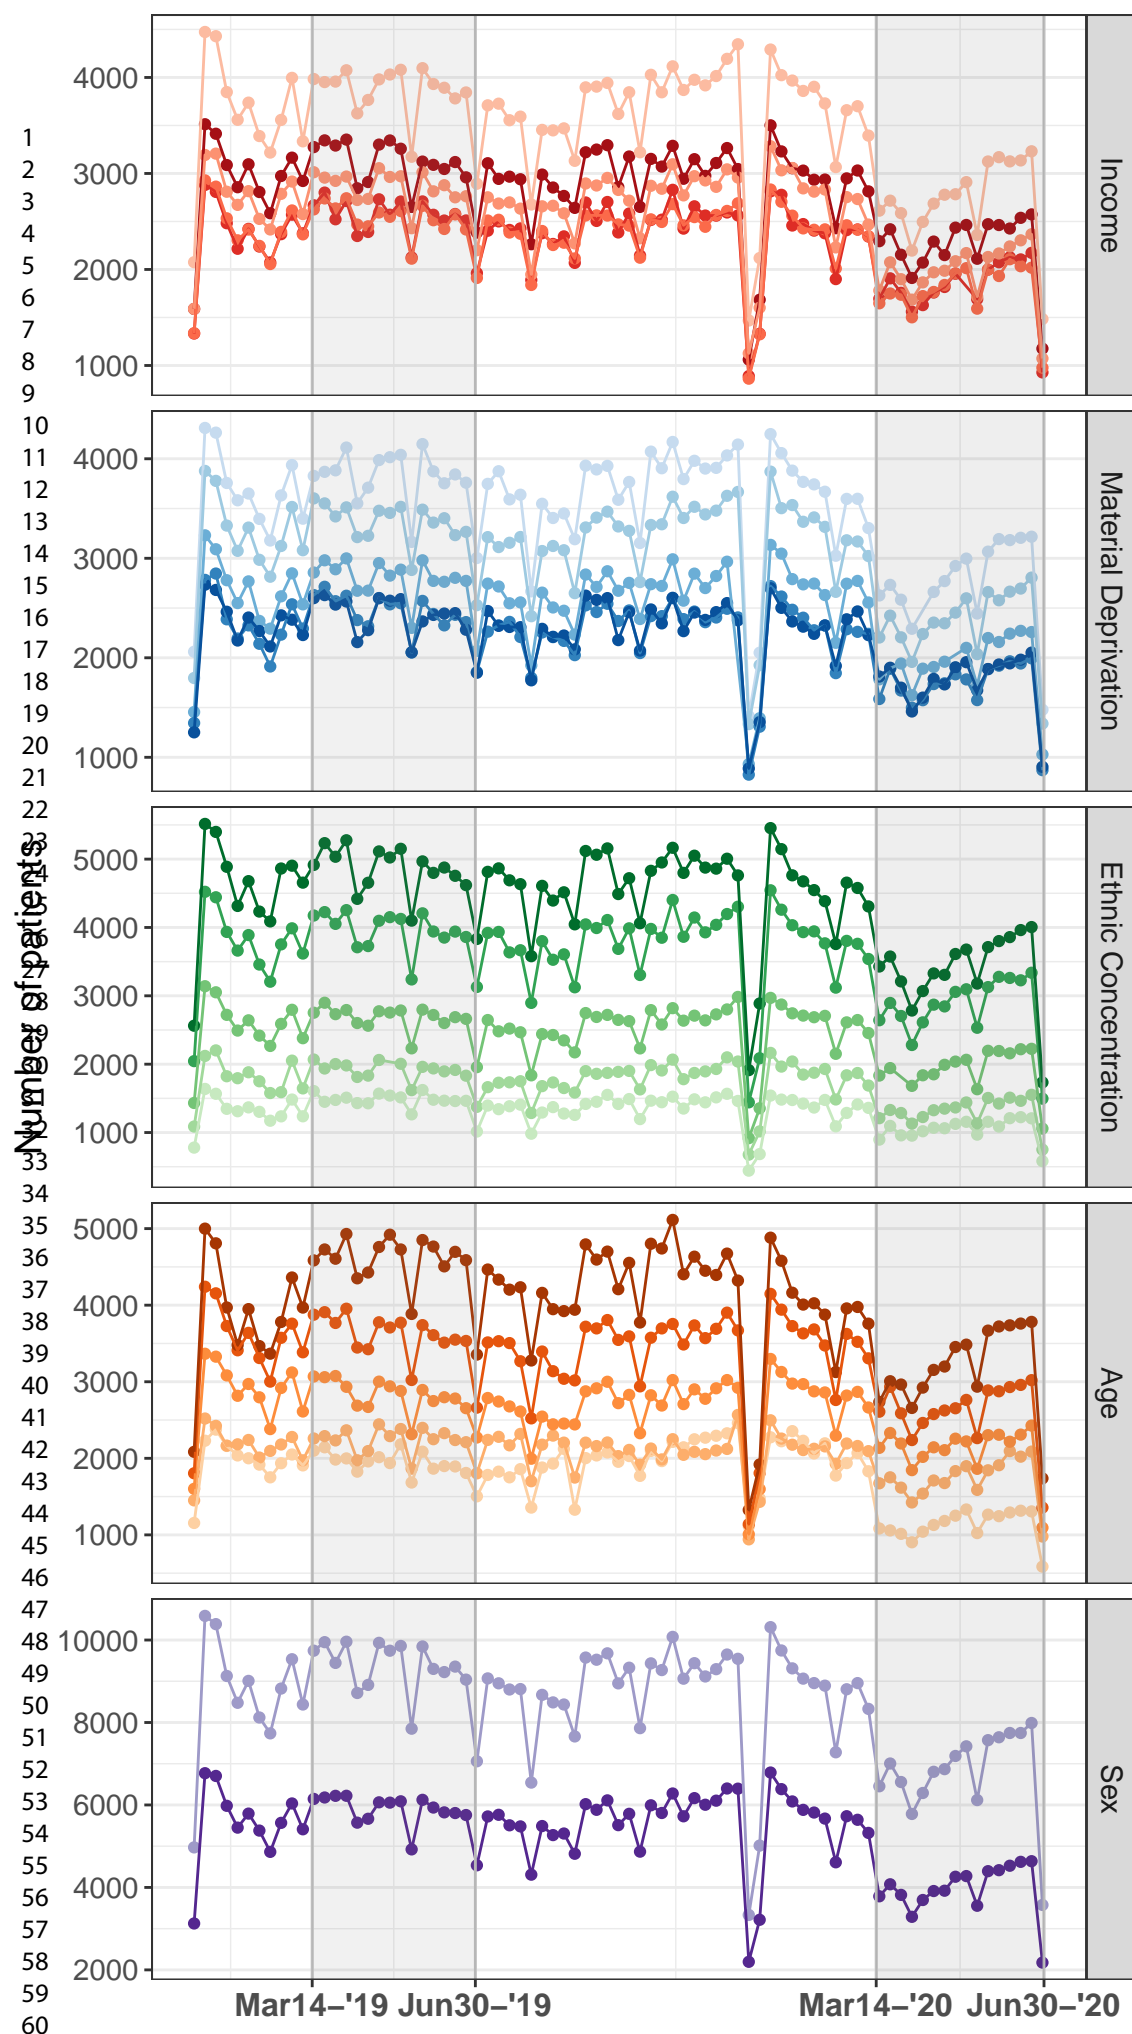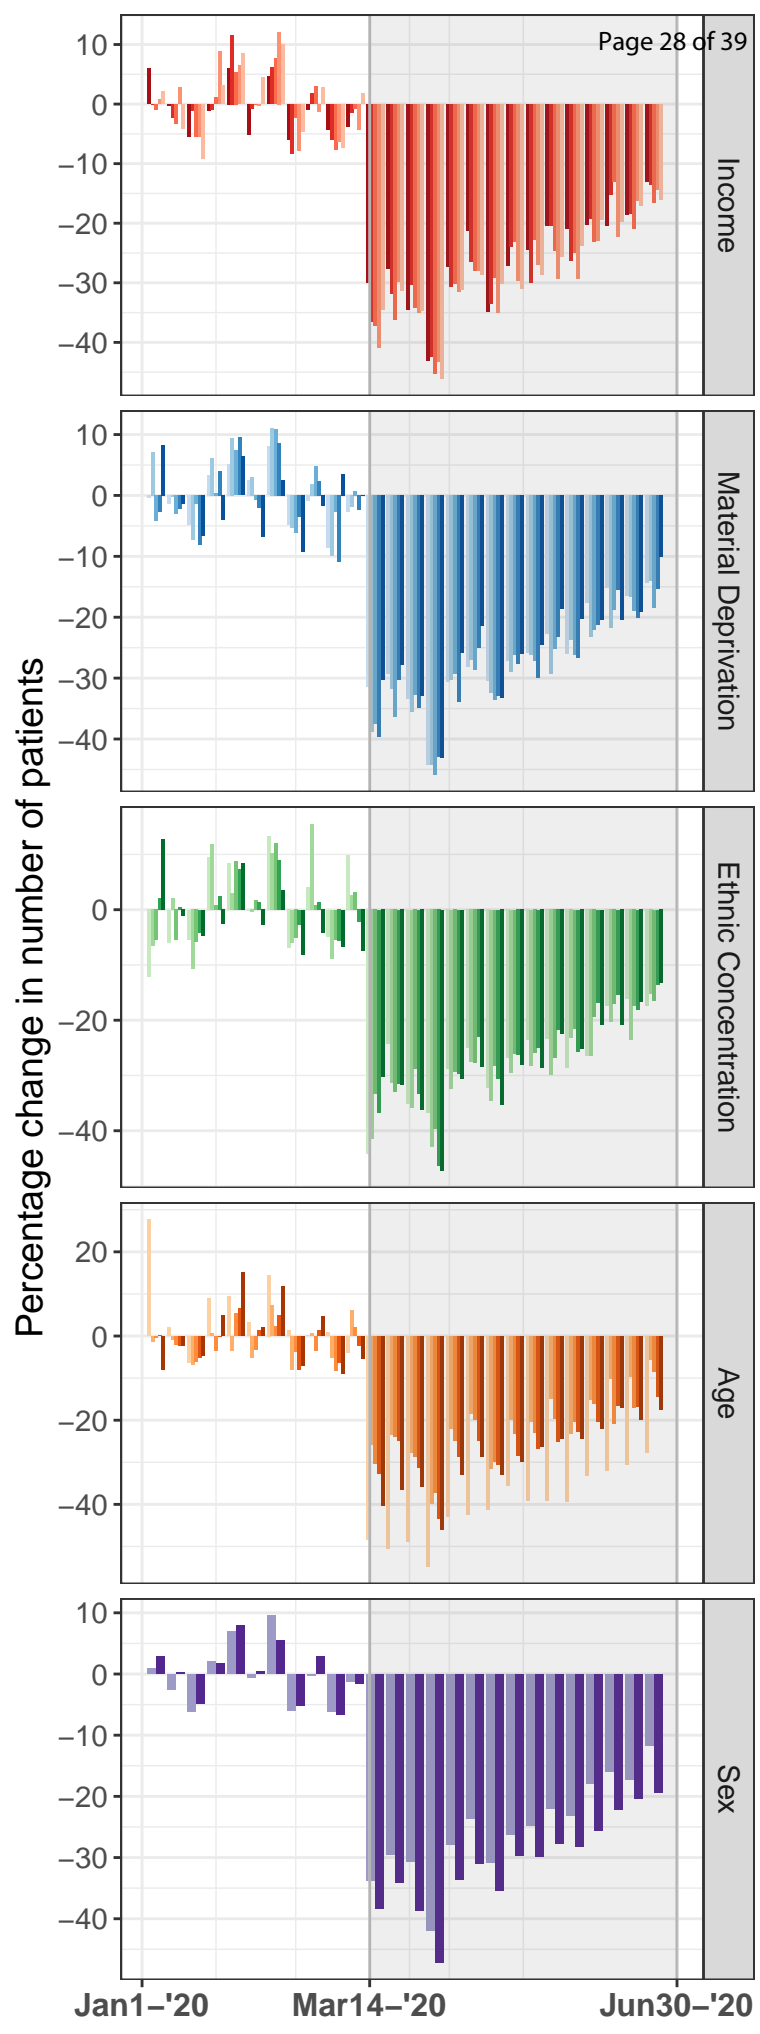

**Income Quintile**

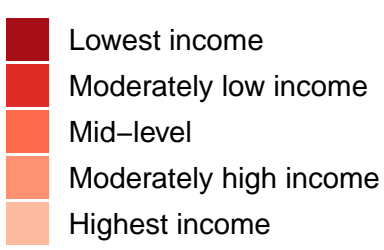

**Material Deprivation Quintile**

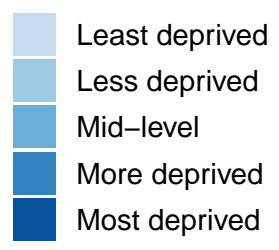

**Ethnic Concentration Quintile**

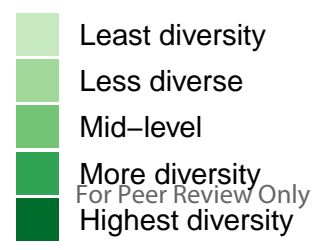

**Age group**

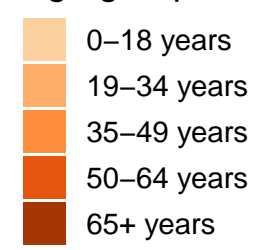

**Sex**

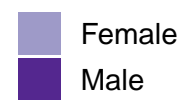

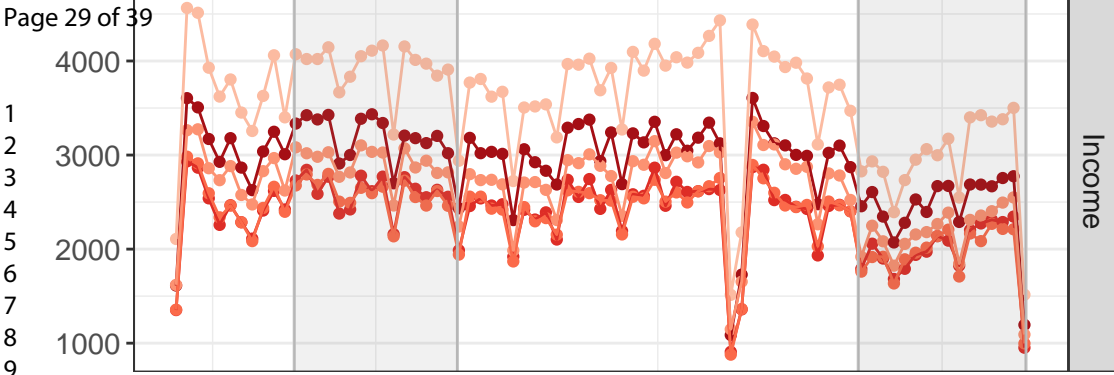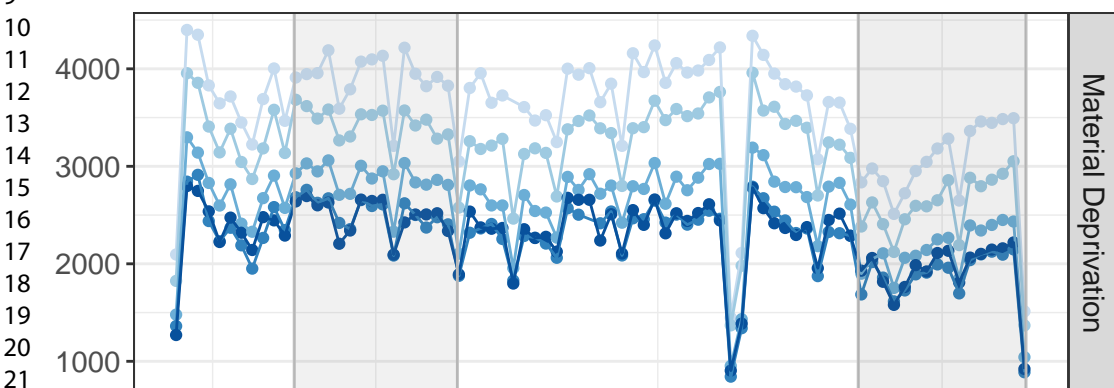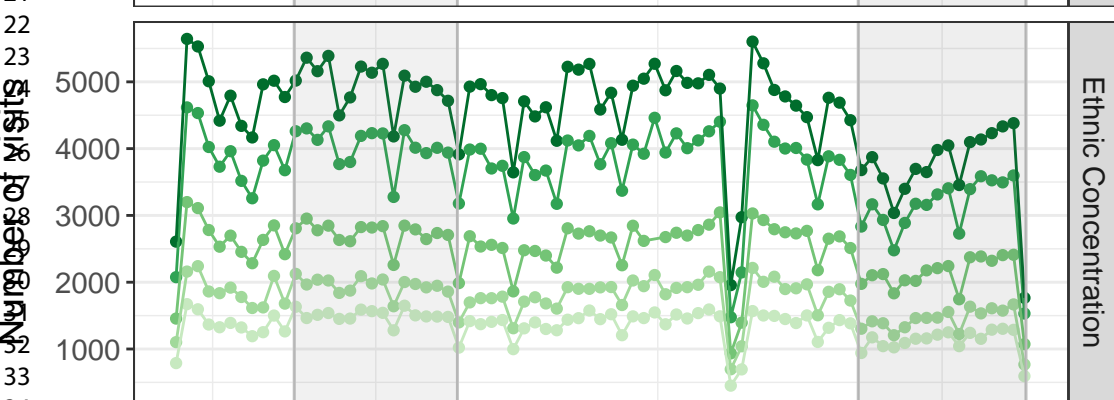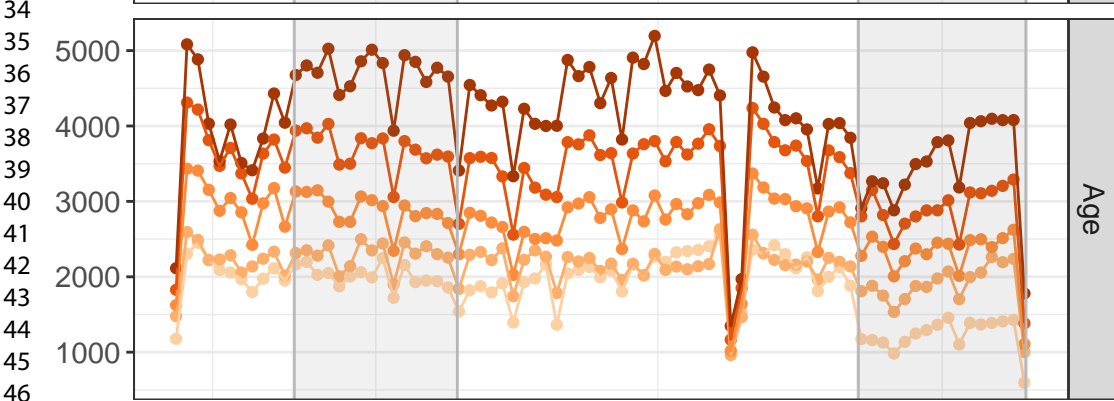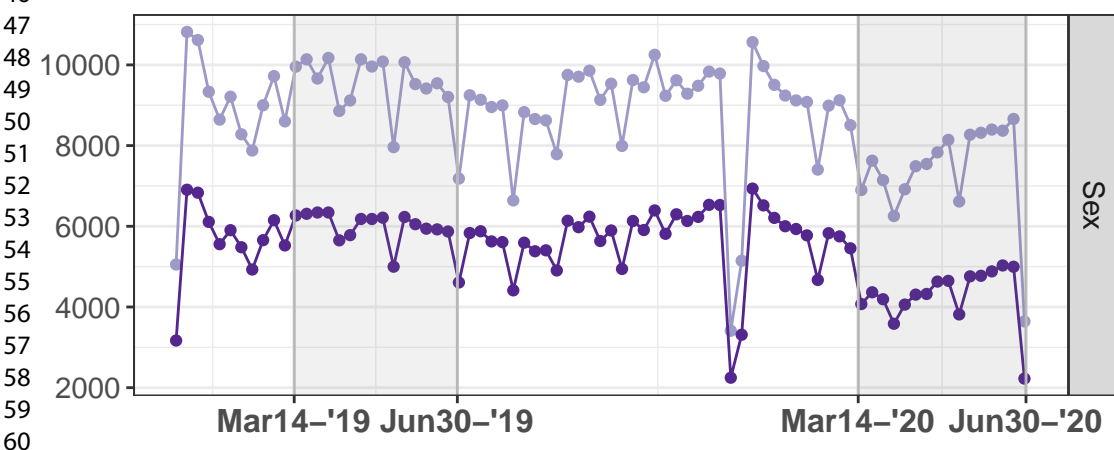

Mar14-'19 Jun30-'19 Mar14-'20 Jun30-'20

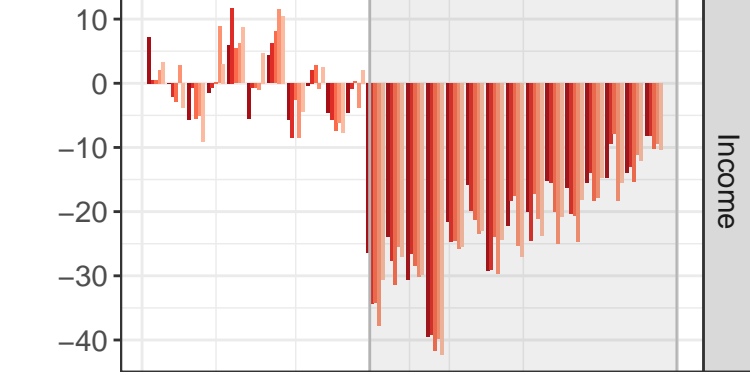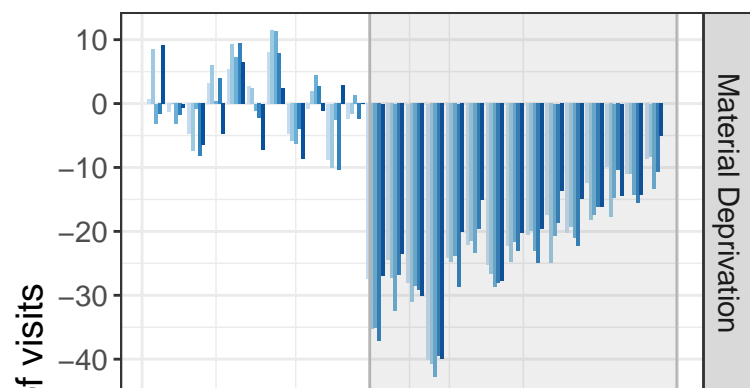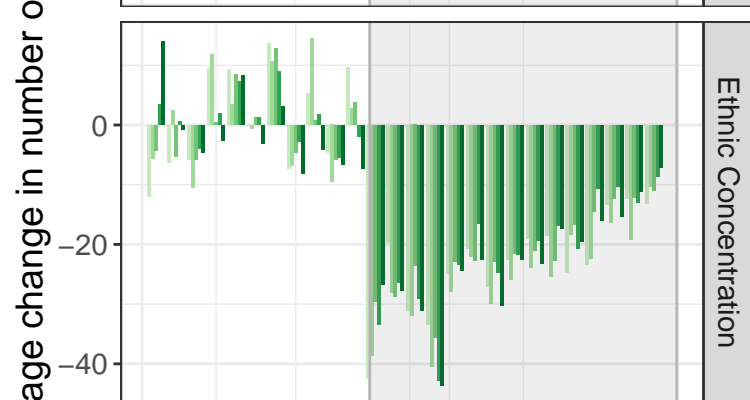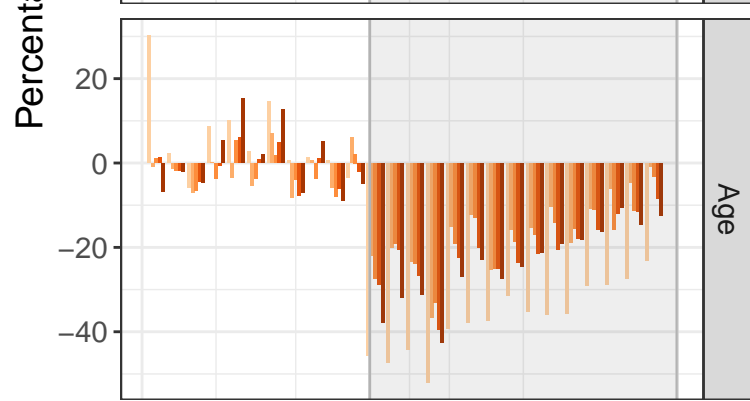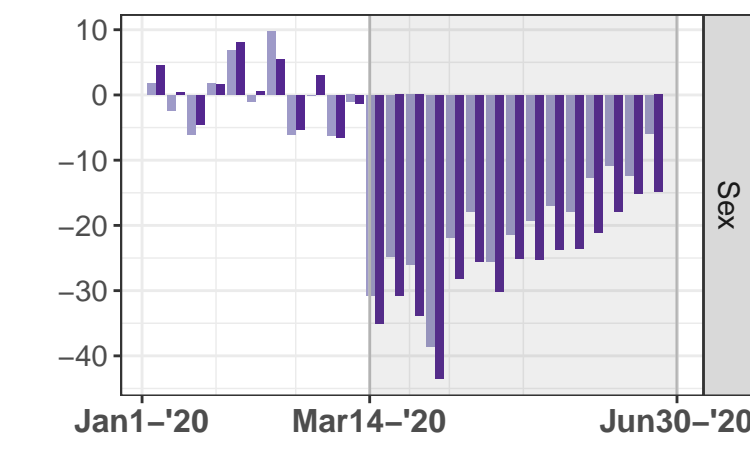

Jan1-'20 Mar14-'20 Jun30-'20

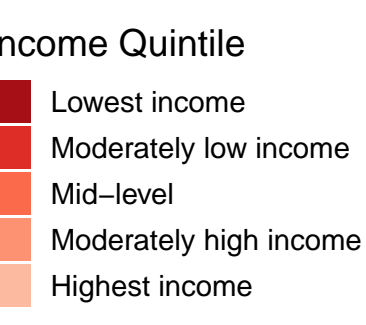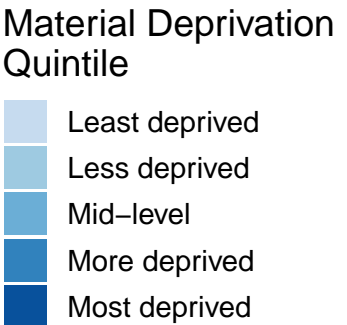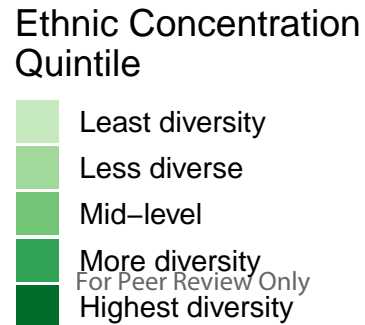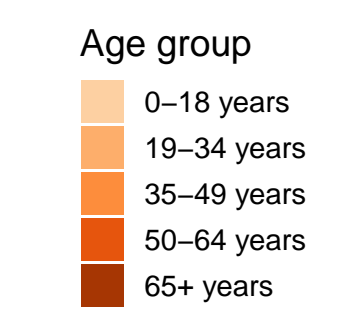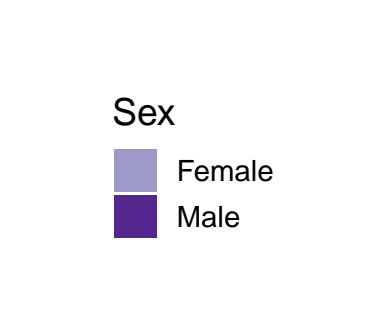

For Peer Review Only

## Supplementary Appendix

*Methodological details for: Changes in family medicine visits after the onset of the COVID-19 pandemic in Ontario: a retrospective cohort study (Stephenson et al. 2020)*

### Data Source

The 2020 Q2 data extract from the University of Toronto Practice-Based Research Network (UTOPIAN) Data Safe Haven was the data source used in the current study. This is the most recent data extract currently available. The cut-off date for inclusion in this data extract was June 30, 2020. The UTOPIAN Data Safe Haven includes electronic medical records collected from 88 family medicine clinics in the Greater Toronto Area and other parts of Ontario, Canada. Eligibility for inclusion in the data analysis was based on the following criteria.

**Physician level:** Family physicians were eligible to contribute to the research cohort if their EMR data met the following criteria:

1. The percentage of rostered patients<sup>1</sup> with a billing record in the year prior to the cut-off date (i.e., June 30, 2020) was greater than or equal to 20%.
2. The percentage of rostered adult patients with a '*selected*' lab test in the year prior to the cut-off date (i.e., June 30, 2020) was greater than or equal to 20%.
3. The percentage of rostered adult patients with a medication record in the year prior to the cut-off date (i.e., June 30, 2020) was greater than or equal to 20%.
4. The physician had at least 200 rostered patients.
5. The earliest date on which the physician had least 10 family physician visits<sup>2</sup> recorded in the EMR (i.e., the EMR start date) was January 1, 2019 or earlier.

**Patient level:** EMR data from patients who met all of the following criteria were included.

1. The patient had their sex and a valid month and year of birth recorded in the EMR.
2. The patient's EMR start date<sup>3</sup> must be at least 18 months prior to the cut-off date for data extraction (June 30, 2020), unless age <1.5 years at the cut-off date. If age < 1.5 years, then the patient must be rostered or have at least 1 Ontario Health Insurance Plan (OHIP) billing service code that is classified as a family physician office visit.<sup>2</sup>
3. The patient must:
  - a. Be rostered to a participating physician
  - OR**
  - b. Have documentation of a periodic health exam (OHIP billing service code K017, K130, K131, K132) in the past 3 years
  - OR**
  - c. Have had at least two encounters in the past 3 years in which an OHIP service code was billed for a family physician office visit
  - OR**
  - d. Have had at least two encounters in the past 3 years in which an OHIP service code was billed for a special or focused practice office visit, hospital visit (including hospital palliative care visit), emergency room visit, home visit, or long-term care visit AND have a populated cumulative patient profile.

1  
2  
3  
4  
5 **Notes:**

- 6  
7  
8  
9  
10  
11  
12  
13  
14  
15  
16  
17  
18  
19  
20  
21  
22  
23  
24  
25  
26  
27  
28  
29  
30  
31  
32  
33  
34  
35  
36  
37  
38  
39  
40  
41  
42  
43  
44  
45  
46  
47  
48  
49  
50  
51  
52  
53  
54  
55  
56  
57  
58  
59  
60
1. **Rostered patients:** Patient rostering is a process by which patients register with a family practice, family physician, or team. Patient rostering defines a population for which the primary care organization or provider is responsible and facilitates an ongoing relationship between the patient and provider. Patients are formally enrolled and enrolment records are updated through the submission of the Per Patient Rostering Fee (PPRF) Codes: Q200A or Q202A. Patients can be formally de-rostered if physicians submit one of the following PPDR Q codes: Q401A (De-Roster – Member Deceased); Q402A (De-Roster – Ended by Provider); Q403A (De-Roster – Patient Left Province). These Q codes were used to identify the number of rostered patients per physician.
  2. **Family physician services: OHIP billing service codes** with a frequency of 50 or more were classified into family physician office visits, special or focused practice office visits, specialist visits, hospital visits, hospital or office prenatal or obstetrical care visits, hospital or home palliative care visits, emergency room visits, home visits, long term care visits, telephone consultations, nurse practitioner visits, add on/premium codes, tracking codes and miscellaneous billing codes.
  3. **Patient EMR Start Date:** EMR start date for each patient is defined as the earliest date of a:
    - a. of a family physician office visit
    - OR**
    - b. a special or focused practice office visit, hospital visit (including hospital palliative care visit), emergency room visit, home visit or long-term care visit with a populated cumulative patient profile in the EMR AND a family physician office visit less than 1 year prior to the cut-off date for data extraction.



## Measures

### Family physician visits

OHIP service codes billed between January 1, 2019 and June 30, 2020 were used to select family physician visits that occurred via telephone, video, or in-person. Billing records for eligible patients containing any of the following service codes were counted as family physician visits.

“Visitors” were patients for whom any of these codes were billed between January 1, 2019 and June 30, 2020; “Non-visitors” were patients for whom none of these codes were billed between January 1, 2019 and June 30, 2020.

| Code | Description                                          | Code | Description                                                  |
|------|------------------------------------------------------|------|--------------------------------------------------------------|
| A001 | minor assessment                                     | K017 | periodic health visit-child aft. 2nd birthday                |
| A002 | enhanced 18-month well baby visit                    | K022 | hiv prim care individ care 1/2 hr or major part              |
| A003 | major assessment                                     | K028 | sexually transmitted disease (std) counseling                |
| A004 | general re-assessment                                | K030 | diabetic management fee                                      |
| A007 | intermediate assessment                              | K032 | gp-specific neurocognitive assessment                        |
| A008 | mini assessment                                      | K033 | counselling - 1 pt/yr/unit                                   |
| A071 | complex medical specific re-assessment               | K039 | smoking cessation follow-up visit                            |
| A131 | complex medical specific re-assessment               | K130 | periodic health visit - adolescent                           |
| A134 | medical specific re-assessment                       | K131 | periodic health visit - adult aged 18 to 64 inclusive        |
| A624 | medical specific re-assessment                       | K132 | periodic health visit - adult 65 years of age and older      |
| A888 | partial assessment                                   | K680 | substance abuse - extended assessment                        |
| A903 | pre-op assessment                                    | P003 | obs.-prenatal care-gen.assess-major prenatal visit           |
| A920 | medical management of early pregnancy, initial visit | P004 | obs.-prenatal care-minor prenatal assess.-subseq.prenat.vis. |
| K005 | primary mental health                                | P005 | antenatal health screen                                      |
| K007 | ind. psychotherapy per half hour - gp                | P008 | obs.-post-natal care in office                               |
| K013 | counselling-one or more people-per 1/2hr             | K037 | fibromyalgia/chronic fatigue syndrome care                   |

|      |                                                                                               |      |                                                                                                       |
|------|-----------------------------------------------------------------------------------------------|------|-------------------------------------------------------------------------------------------------------|
| K080 | Minor assessment of patient by telephone or video                                             | K081 | Intermediate assessment including psychotherapy by telephone or video                                 |
| K082 | Psychotherapy, psychiatric or mental health counselling by telephone or video                 | K087 | Minor assessment of an uninsured by telephone or video                                                |
| K088 | Intermediate assessment of an uninsured patient including psychotherapy by telephone or video | K089 | Psychotherapy, psychiatric or mental health counselling of an uninsured patient by telephone or video |

### Visit format

Two visit formats were defined: *virtual* (i.e., telephone or video) and *in-person*.

Virtual visits were defined based on the use of virtual visit billing codes introduced specifically in response to the COVID-19 pandemic or based on the use of codes for billing services to the Ontario Telehealth Network (a virtual care service that was implemented prior to the COVID-19 pandemic).

A *virtual visit* was counted for any date on which any of the following conditions were met:

- 1) A service code for a family physician visit was billed (as defined above) and an applicable Virtual Care Program (OTN) service code was billed (B099, B101, B102, B103, B201, B202, B203).
- 2) Any of the OHIP codes for family physician visits by telephone or video were billed: K080, K081, K082, K087, K088, K089.

An *in-person visit* was counted for any date on which any of the following criteria were met:

- 1) A service code for a family physician visit was billed (as defined above excluding visits by telephone or video -- K080, K081, K082, K087, K088, K089) AND no Virtual Care Program (OTN) service code was billed (B099, B101, B102, B103, B201, B202, B203).
- 2) A Virtual Care Program (OTN) service code and 2 or more service codes for a family physician visit (as defined above excluding visits by telephone or video -- K080, K081, K082, K087, K088, K089) were billed on the same date.

**Patient sex.** Sex is extracted from the EMR.

**Patient age.** Year and month of birth are extracted from the EMR. Each patient's age is calculated as of the cut-off date for data extraction (i.e., June 30, 2020), using the middle of the birth month as the day of birth.

1  
2  
3 **Income quintile.** Statistics Canada’s Postal Code<sup>OM</sup> Conversion File Plus (PCCF+) tool was  
4 used to assign an income quintile to each participant based on their postal address. The PCCF+  
5 tool assigns postal codes to standard census geographic areas that have corresponding area-level  
6 equity stratifiers such as income quintiles and geographic location (urban and rural/remote). The  
7 Neighbourhood Income Quintile (CMA/CA) Before Tax (QABTIPPE) was used in the current  
8 study. This variable is constructed by using the distribution of incomes within census  
9 metropolitan areas (CMAs), census agglomerations (CAs) and provincial residual areas within a  
10 province to categorize these areas into income quintiles. Missing data on this variable could  
11 occur if no postal code was available in the EMR or is the corresponding income quintile was  
12 unknown/undefined.  
13  
14

15 **Material deprivation quintile.** The material deprivation dimension of the Ontario  
16 Marginalization Index uses 6 indicators that come from Statistics Canada and are extracted by  
17 the Ontario Agency for Health Protection and Promotion. Quintiles defined for each census  
18 dissemination area (DA) are available through Public Health Ontario and were used in the  
19 current study (i.e., variable “deprivation\_q\_DA16”). Statistics Canada’s Postal Code<sup>OM</sup>  
20 Conversion File Plus (PCCF+) tool was used to identify the appropriate dissemination area to  
21 each patient based their postal code.  
22  
23

24 **Ethnic concentration quintile.** The ethnic concentration dimension of the Ontario  
25 Marginalization Index uses 2 indicators that come from Statistics Canada and are extracted by  
26 the Ontario Agency for Health Protection and Promotion. Quintiles defined for each census  
27 dissemination area (DA) are available through Public Health Ontario and were used in the  
28 current study (i.e., variable “ethniccon\_q\_DA16”). Statistics Canada’s Postal Code<sup>OM</sup>  
29 Conversion File Plus (PCCF+) tool was used to identify the appropriate dissemination area to  
30 each patient based their postal code.  
31  
32  
33  
34  
35  
36  
37  
38  
39  
40  
41  
42  
43  
44  
45  
46  
47  
48  
49  
50  
51  
52  
53  
54  
55  
56  
57  
58  
59  
60

**The RECORD statement – checklist of items, extended from the STROBE statement, that should be reported in observational studies using routinely collected health data.**

**Completed for manuscript titled:** Changes in family medicine visits after the onset of the COVID-19 pandemic in Ontario: a retrospective cohort study (Stephenson et al., 2020)

|                           | Item No. | STROBE items                                                                                                                                                                               | Location in manuscript where items are reported | RECORD items                                                                                                                                                                                                                                                                                                                                                                                                                                | Location in manuscript where items are reported        |
|---------------------------|----------|--------------------------------------------------------------------------------------------------------------------------------------------------------------------------------------------|-------------------------------------------------|---------------------------------------------------------------------------------------------------------------------------------------------------------------------------------------------------------------------------------------------------------------------------------------------------------------------------------------------------------------------------------------------------------------------------------------------|--------------------------------------------------------|
| <b>Title and abstract</b> |          |                                                                                                                                                                                            |                                                 |                                                                                                                                                                                                                                                                                                                                                                                                                                             |                                                        |
|                           | 1        | (a) Indicate the study’s design with a commonly used term in the title or the abstract (b) Provide in the abstract an informative and balanced summary of what was done and what was found | Title (page 1)<br>Abstract (page 3)             | RECORD 1.1: The type of data used should be specified in the title or abstract. When possible, the name of the databases used should be included.<br><br>RECORD 1.2: If applicable, the geographic region and timeframe within which the study took place should be reported in the title or abstract.<br><br>RECORD 1.3: If linkage between databases was conducted for the study, this should be clearly stated in the title or abstract. | 1.1 Abstract (page 3)<br>1.2 Title (page 1)<br>1.3 N/A |
| <b>Introduction</b>       |          |                                                                                                                                                                                            |                                                 |                                                                                                                                                                                                                                                                                                                                                                                                                                             |                                                        |
| Background rationale      | 2        | Explain the scientific background and rationale for the investigation being reported                                                                                                       | Introduction (page 5)                           |                                                                                                                                                                                                                                                                                                                                                                                                                                             |                                                        |
| Objectives                | 3        | State specific objectives, including any prespecified hypotheses                                                                                                                           | Introduction (page 6)                           |                                                                                                                                                                                                                                                                                                                                                                                                                                             |                                                        |
| <b>Methods</b>            |          |                                                                                                                                                                                            |                                                 |                                                                                                                                                                                                                                                                                                                                                                                                                                             |                                                        |
| Study Design              | 4        | Present key elements of study design early in the paper                                                                                                                                    | Study Design (page 6)                           |                                                                                                                                                                                                                                                                                                                                                                                                                                             |                                                        |
| Setting                   | 5        | Describe the setting, locations, and relevant dates, including                                                                                                                             | Data source (Page 6)                            |                                                                                                                                                                                                                                                                                                                                                                                                                                             |                                                        |

|                                                                                                                                                                   |                              |                                                                  |                                                                                                                                                                                                                                                                                                                                                                                                                                                                                                                                                                                                                                                                                                                              |                                                                   |                                                                                                                                                                                                                                                                                                                                                                                                                                                                                                                                                                                                                                                                                                      |                        |
|-------------------------------------------------------------------------------------------------------------------------------------------------------------------|------------------------------|------------------------------------------------------------------|------------------------------------------------------------------------------------------------------------------------------------------------------------------------------------------------------------------------------------------------------------------------------------------------------------------------------------------------------------------------------------------------------------------------------------------------------------------------------------------------------------------------------------------------------------------------------------------------------------------------------------------------------------------------------------------------------------------------------|-------------------------------------------------------------------|------------------------------------------------------------------------------------------------------------------------------------------------------------------------------------------------------------------------------------------------------------------------------------------------------------------------------------------------------------------------------------------------------------------------------------------------------------------------------------------------------------------------------------------------------------------------------------------------------------------------------------------------------------------------------------------------------|------------------------|
|                                                                                                                                                                   |                              | periods of recruitment, exposure, follow-up, and data collection |                                                                                                                                                                                                                                                                                                                                                                                                                                                                                                                                                                                                                                                                                                                              |                                                                   |                                                                                                                                                                                                                                                                                                                                                                                                                                                                                                                                                                                                                                                                                                      |                        |
| 1<br>2<br>3<br>4<br>5<br>6<br>7<br>8<br>9<br>10<br>11<br>12<br>13<br>14<br>15<br>16<br>17<br>18<br>19<br>20<br>21<br>22<br>23<br>24<br>25<br>26<br>27<br>28<br>29 | Participants                 | 6                                                                | <p>(a) <i>Cohort study</i> - Give the eligibility criteria, and the sources and methods of selection of participants. Describe methods of follow-up</p> <p><i>Case-control study</i> - Give the eligibility criteria, and the sources and methods of case ascertainment and control selection. Give the rationale for the choice of cases and controls</p> <p><i>Cross-sectional study</i> - Give the eligibility criteria, and the sources and methods of selection of participants</p> <p>(b) <i>Cohort study</i> - For matched studies, give matching criteria and number of exposed and unexposed</p> <p><i>Case-control study</i> - For matched studies, give matching criteria and the number of controls per case</p> | Data source (Page 6-7)                                            | <p>RECORD 6.1: The methods of study population selection (such as codes or algorithms used to identify subjects) should be listed in detail. If this is not possible, an explanation should be provided.</p> <p>RECORD 6.2: Any validation studies of the codes or algorithms used to select the population should be referenced. If validation was conducted for this study and not published elsewhere, detailed methods and results should be provided.</p> <p>RECORD 6.3: If the study involved linkage of databases, consider use of a flow diagram or other graphical display to demonstrate the data linkage process, including the number of individuals with linked data at each stage.</p> | Supplementary appendix |
| 30<br>31<br>32<br>33<br>34<br>35<br>36                                                                                                                            | Variables                    | 7                                                                | Clearly define all outcomes, exposures, predictors, potential confounders, and effect modifiers. Give diagnostic criteria, if applicable.                                                                                                                                                                                                                                                                                                                                                                                                                                                                                                                                                                                    | Outcome measures (page 7)<br>Sociodemographic measures (page 7-8) | RECORD 7.1: A complete list of codes and algorithms used to classify exposures, outcomes, confounders, and effect modifiers should be provided. If these cannot be reported, an explanation should be provided.                                                                                                                                                                                                                                                                                                                                                                                                                                                                                      | Supplementary appendix |
| 37<br>38<br>39<br>40<br>41<br>42<br>43<br>44<br>45<br>46<br>47                                                                                                    | Data sources/<br>measurement | 8                                                                | For each variable of interest, give sources of data and details of methods of assessment (measurement).                                                                                                                                                                                                                                                                                                                                                                                                                                                                                                                                                                                                                      | Outcome measures (page 7)<br>Sociodemographic measures (page 7-8) |                                                                                                                                                                                                                                                                                                                                                                                                                                                                                                                                                                                                                                                                                                      |                        |

|                                  |    |                                                                                                                                                                                                                                                                                                                                                                                                                                                                                                                                                                      |                                                                   |                                                                                                                                                       |                        |
|----------------------------------|----|----------------------------------------------------------------------------------------------------------------------------------------------------------------------------------------------------------------------------------------------------------------------------------------------------------------------------------------------------------------------------------------------------------------------------------------------------------------------------------------------------------------------------------------------------------------------|-------------------------------------------------------------------|-------------------------------------------------------------------------------------------------------------------------------------------------------|------------------------|
|                                  |    | Describe comparability of assessment methods if there is more than one group                                                                                                                                                                                                                                                                                                                                                                                                                                                                                         |                                                                   |                                                                                                                                                       |                        |
| Bias                             | 9  | Describe any efforts to address potential sources of bias                                                                                                                                                                                                                                                                                                                                                                                                                                                                                                            | Study design (page 6)                                             |                                                                                                                                                       |                        |
| Study size                       | 10 | Explain how the study size was arrived at                                                                                                                                                                                                                                                                                                                                                                                                                                                                                                                            | Data source (page 6)                                              |                                                                                                                                                       |                        |
| Quantitative variables           | 11 | Explain how quantitative variables were handled in the analyses. If applicable, describe which groupings were chosen, and why                                                                                                                                                                                                                                                                                                                                                                                                                                        | Outcome measures (page 7)<br>Sociodemographic measures (page 7-8) |                                                                                                                                                       |                        |
| Statistical methods              | 12 | (a) Describe all statistical methods, including those used to control for confounding<br>(b) Describe any methods used to examine subgroups and interactions<br>(c) Explain how missing data were addressed<br>(d) <i>Cohort study</i> - If applicable, explain how loss to follow-up was addressed<br><i>Case-control study</i> - If applicable, explain how matching of cases and controls was addressed<br><i>Cross-sectional study</i> - If applicable, describe analytical methods taking account of sampling strategy<br>(e) Describe any sensitivity analyses | Analytic Approach (page 8)                                        |                                                                                                                                                       |                        |
| Data access and cleaning methods |    | ..                                                                                                                                                                                                                                                                                                                                                                                                                                                                                                                                                                   |                                                                   | RECORD 12.1: Authors should describe the extent to which the investigators had access to the database population used to create the study population. | Supplementary Appendix |

|                  |    |                                                                                                                                                                                                                                                                                                                                                 |                                              |                                                                                                                                                                                                                                                                                                                    |                                             |
|------------------|----|-------------------------------------------------------------------------------------------------------------------------------------------------------------------------------------------------------------------------------------------------------------------------------------------------------------------------------------------------|----------------------------------------------|--------------------------------------------------------------------------------------------------------------------------------------------------------------------------------------------------------------------------------------------------------------------------------------------------------------------|---------------------------------------------|
|                  |    |                                                                                                                                                                                                                                                                                                                                                 |                                              | RECORD 12.2: Authors should provide information on the data cleaning methods used in the study.                                                                                                                                                                                                                    |                                             |
| Linkage          |    | ..                                                                                                                                                                                                                                                                                                                                              |                                              | RECORD 12.3: State whether the study included person-level, institutional-level, or other data linkage across two or more databases. The methods of linkage and methods of linkage quality evaluation should be provided.                                                                                          | Supplementary Appendix                      |
| <b>Results</b>   |    |                                                                                                                                                                                                                                                                                                                                                 |                                              |                                                                                                                                                                                                                                                                                                                    |                                             |
| Participants     | 13 | (a) Report the numbers of individuals at each stage of the study ( <i>e.g.</i> , numbers potentially eligible, examined for eligibility, confirmed eligible, included in the study, completing follow-up, and analysed)<br>(b) Give reasons for non-participation at each stage.<br>(c) Consider use of a flow diagram                          | Results (page 9)                             | RECORD 13.1: Describe in detail the selection of the persons included in the study ( <i>i.e.</i> , study population selection) including filtering based on data quality, data availability and linkage. The selection of included persons can be described in the text and/or by means of the study flow diagram. | Results (page 9);<br>Supplementary Appendix |
| Descriptive data | 14 | (a) Give characteristics of study participants ( <i>e.g.</i> , demographic, clinical, social) and information on exposures and potential confounders<br>(b) Indicate the number of participants with missing data for each variable of interest<br>(c) <i>Cohort study</i> - summarise follow-up time ( <i>e.g.</i> , average and total amount) | Table 1 (page 18-20)                         |                                                                                                                                                                                                                                                                                                                    |                                             |
| Outcome data     | 15 | <i>Cohort study</i> - Report numbers of outcome events or summary measures over time                                                                                                                                                                                                                                                            | Table 2 (page 21-22)<br>Table 3 (page 23-24) |                                                                                                                                                                                                                                                                                                                    |                                             |

|                   |    |                                                                                                                                                                                                                                                                                                                                                                                                                                |                          |                                                                                                                                                                                                                                                                                                          |                             |
|-------------------|----|--------------------------------------------------------------------------------------------------------------------------------------------------------------------------------------------------------------------------------------------------------------------------------------------------------------------------------------------------------------------------------------------------------------------------------|--------------------------|----------------------------------------------------------------------------------------------------------------------------------------------------------------------------------------------------------------------------------------------------------------------------------------------------------|-----------------------------|
|                   |    | <p><i>Case-control study</i> - Report numbers in each exposure category, or summary measures of exposure</p> <p><i>Cross-sectional study</i> - Report numbers of outcome events or summary measures</p>                                                                                                                                                                                                                        |                          |                                                                                                                                                                                                                                                                                                          |                             |
| Main results      | 16 | <p>(a) Give unadjusted estimates and, if applicable, confounder-adjusted estimates and their precision (e.g., 95% confidence interval). Make clear which confounders were adjusted for and why they were included</p> <p>(b) Report category boundaries when continuous variables were categorized</p> <p>(c) If relevant, consider translating estimates of relative risk into absolute risk for a meaningful time period</p> | Table 4 (page 25-26)     |                                                                                                                                                                                                                                                                                                          |                             |
| Other analyses    | 17 | Report other analyses done— e.g., analyses of subgroups and interactions, and sensitivity analyses                                                                                                                                                                                                                                                                                                                             |                          |                                                                                                                                                                                                                                                                                                          |                             |
| <b>Discussion</b> |    |                                                                                                                                                                                                                                                                                                                                                                                                                                |                          |                                                                                                                                                                                                                                                                                                          |                             |
| Key results       | 18 | Summarise key results with reference to study objectives                                                                                                                                                                                                                                                                                                                                                                       | Interpretation (page 10) |                                                                                                                                                                                                                                                                                                          |                             |
| Limitations       | 19 | Discuss limitations of the study, taking into account sources of potential bias or imprecision. Discuss both direction and magnitude of any potential bias                                                                                                                                                                                                                                                                     | Interpretation (page 12) | RECORD 19.1: Discuss the implications of using data that were not created or collected to answer the specific research question(s). Include discussion of misclassification bias, unmeasured confounding, missing data, and changing eligibility over time, as they pertain to the study being reported. | Interpretation (page 11-12) |



|                                  |                                                           |    |                                                                                                                                                                            |                             |                                                                                                                                                          |                                 |
|----------------------------------|-----------------------------------------------------------|----|----------------------------------------------------------------------------------------------------------------------------------------------------------------------------|-----------------------------|----------------------------------------------------------------------------------------------------------------------------------------------------------|---------------------------------|
| 1<br>2<br>3<br>4<br>5<br>6<br>7  | Interpretation                                            | 20 | Give a cautious overall interpretation of results considering objectives, limitations, multiplicity of analyses, results from similar studies, and other relevant evidence | Interpretation (page 13)    |                                                                                                                                                          |                                 |
| 8<br>9<br>10<br>11               | Generalisability                                          | 21 | Discuss the generalisability (external validity) of the study results                                                                                                      | Interpretation (page 11-12) |                                                                                                                                                          |                                 |
| 12                               | <b>Other Information</b>                                  |    |                                                                                                                                                                            |                             |                                                                                                                                                          |                                 |
| 13<br>14<br>15<br>16<br>17<br>18 | Funding                                                   | 22 | Give the source of funding and the role of the funders for the present study and, if applicable, for the original study on which the present article is based              | Funding statement (page 2)  |                                                                                                                                                          |                                 |
| 19<br>20<br>21<br>22<br>23<br>24 | Accessibility of protocol, raw data, and programming code |    | ..                                                                                                                                                                         |                             | RECORD 22.1: Authors should provide information on how to access any supplemental information such as the study protocol, raw data, or programming code. | Data sharing statement (page 2) |

25  
26 \*Reference: Benchimol EI, Smeeth L, Guttman A, Harron K, Moher D, Petersen I, Sørensen HT, von Elm E, Langan SM, the RECORD Working  
27 Committee. The REporting of studies Conducted using Observational Routinely-collected health Data (RECORD) Statement. *PLoS Medicine* 2015;  
28 in press.

29  
30 \*Checklist is protected under Creative Commons Attribution ([CC BY](https://creativecommons.org/licenses/by/4.0/)) license.  
31  
32  
33  
34  
35  
36  
37  
38  
39  
40  
41  
42  
43  
44
